# Supplementary material for: New Hydrolyzable Tannin with Potent Antioxidant and α-Glucosidase Inhibitory Activity from Black Tea Produced from Camellia taliensis
Source: Foods. 2023 Jun 28;12(13):2512. doi: 10.3390/foods12132512 (PMC10340768; doi:10.3390/foods12132512)

## Supplementary data contents page

### New hydrolyzable tannin with potent antioxidant and $\alpha$ -glucosidase inhibitory activity from black tea produced from *Camellia taliensis*

Min Chen<sup>1,2,†</sup>, Na Li<sup>1,†</sup>, Hong-Tao Zhu<sup>1</sup>, Man Zhang<sup>1</sup>, Zhao-Hong Duan<sup>3</sup>, Dong Wang<sup>1</sup>, Chong-Ren Yang<sup>1</sup>, and Ying-Jun Zhang<sup>1,\*</sup>

<sup>1</sup> State Key Laboratory of Phytochemistry and Plant Resources in West China, Kunming Institute of Botany, Chinese Academy of Sciences, Kunming 650201, People's Republic of China

<sup>2</sup> University of Chinese Academy of Sciences, Beijing 100049, People's Republic of China

<sup>3</sup> Zhao-Hong Gu-Shu Training Center, Lincang 675911, People's Republic of China

† These authors contributed equally to this work

\* Correspondence: [zhangyj@mail.kib.ac.cn](mailto:zhangyj@mail.kib.ac.cn) (Y.J.Z.); Tel.: + 86 871 6522 3235

1. Figure S1. <sup>1</sup>H NMR spectrum of compound **1** in CD<sub>3</sub>OD
2. Figure S2. <sup>13</sup>C NMR spectrum of compound **1** in CD<sub>3</sub>OD
3. Figure S3. HSQC spectrum of compound **1** in CD<sub>3</sub>OD
4. Figure S4. HMBC spectrum of compound **1** in CD<sub>3</sub>OD
5. Figure S5. COSY spectrum of compound **1** in CD<sub>3</sub>OD
6. Figure S6. ROESY spectrum of compound **1** in CD<sub>3</sub>OD
7. Figure S7. HRESI-MS spectrum of compound **1**
8. Figure S8. CD and UV spectra of compound **1** in MeOH
9. Figure S9. OR of compound **1** in MeOH
10. Figure S10. Previous studies on the oxidative coupling of galloyl groups
11. Figure S11. <sup>1</sup>H NMR spectrum of compound **2** in CD<sub>3</sub>OD
12. Figure S12. <sup>13</sup>C NMR spectrum of compound **2** in CD<sub>3</sub>OD
13. Figure S13. <sup>1</sup>H NMR spectrum of compound **3** in CD<sub>3</sub>OD
14. Figure S14. <sup>13</sup>C NMR spectrum of compound **3** in CD<sub>3</sub>OD
15. Figure S15. <sup>1</sup>H NMR spectrum of compound **4** in CD<sub>3</sub>OD
16. Figure S16. <sup>13</sup>C NMR spectrum of compound **4** in CD<sub>3</sub>OD
17. Figure S17. <sup>1</sup>H NMR spectrum of compound **5** in CD<sub>3</sub>OD

18. Figure S18.  $^{13}\text{C}$  NMR spectrum of compound **5** in  $\text{CD}_3\text{OD}$
19. Figure S19.  $^1\text{H}$  NMR spectrum of compound **6** in  $\text{CD}_3\text{OD}$
20. Figure S20.  $^{13}\text{C}$  NMR spectrum of compound **6** in  $\text{CD}_3\text{OD}$
21. Figure S21.  $^1\text{H}$  NMR spectrum of compound **7** in  $\text{CD}_3\text{OD}$
22. Figure S22.  $^{13}\text{C}$  NMR spectrum of compound **7** in  $\text{CD}_3\text{OD}$
23. Figure S23.  $^1\text{H}$  NMR spectrum of compound **8** in  $\text{CD}_3\text{OD}$
24. Figure S24.  $^{13}\text{C}$  NMR spectrum of compound **8** in  $\text{CD}_3\text{OD}$

Figure S1.  $^1\text{H}$  NMR spectrum of compound **1** in  $\text{CD}_3\text{OD}$

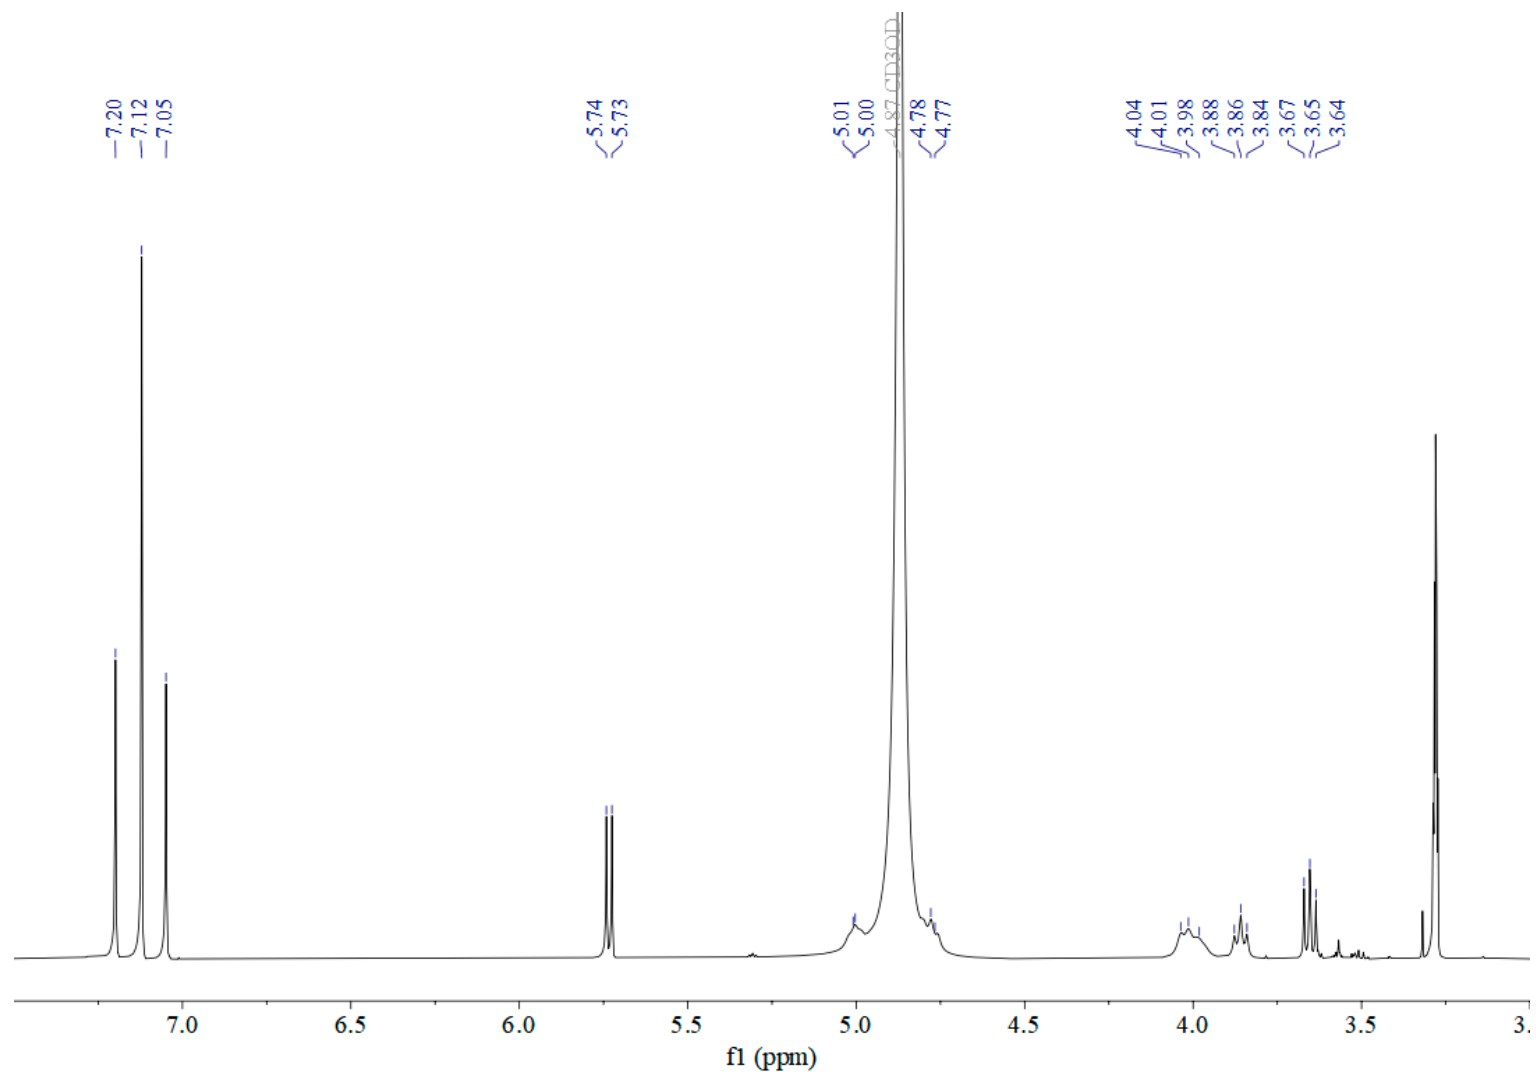

Figure S2.  $^{13}\text{C}$  NMR spectrum of compound **1** in  $\text{CD}_3\text{OD}$

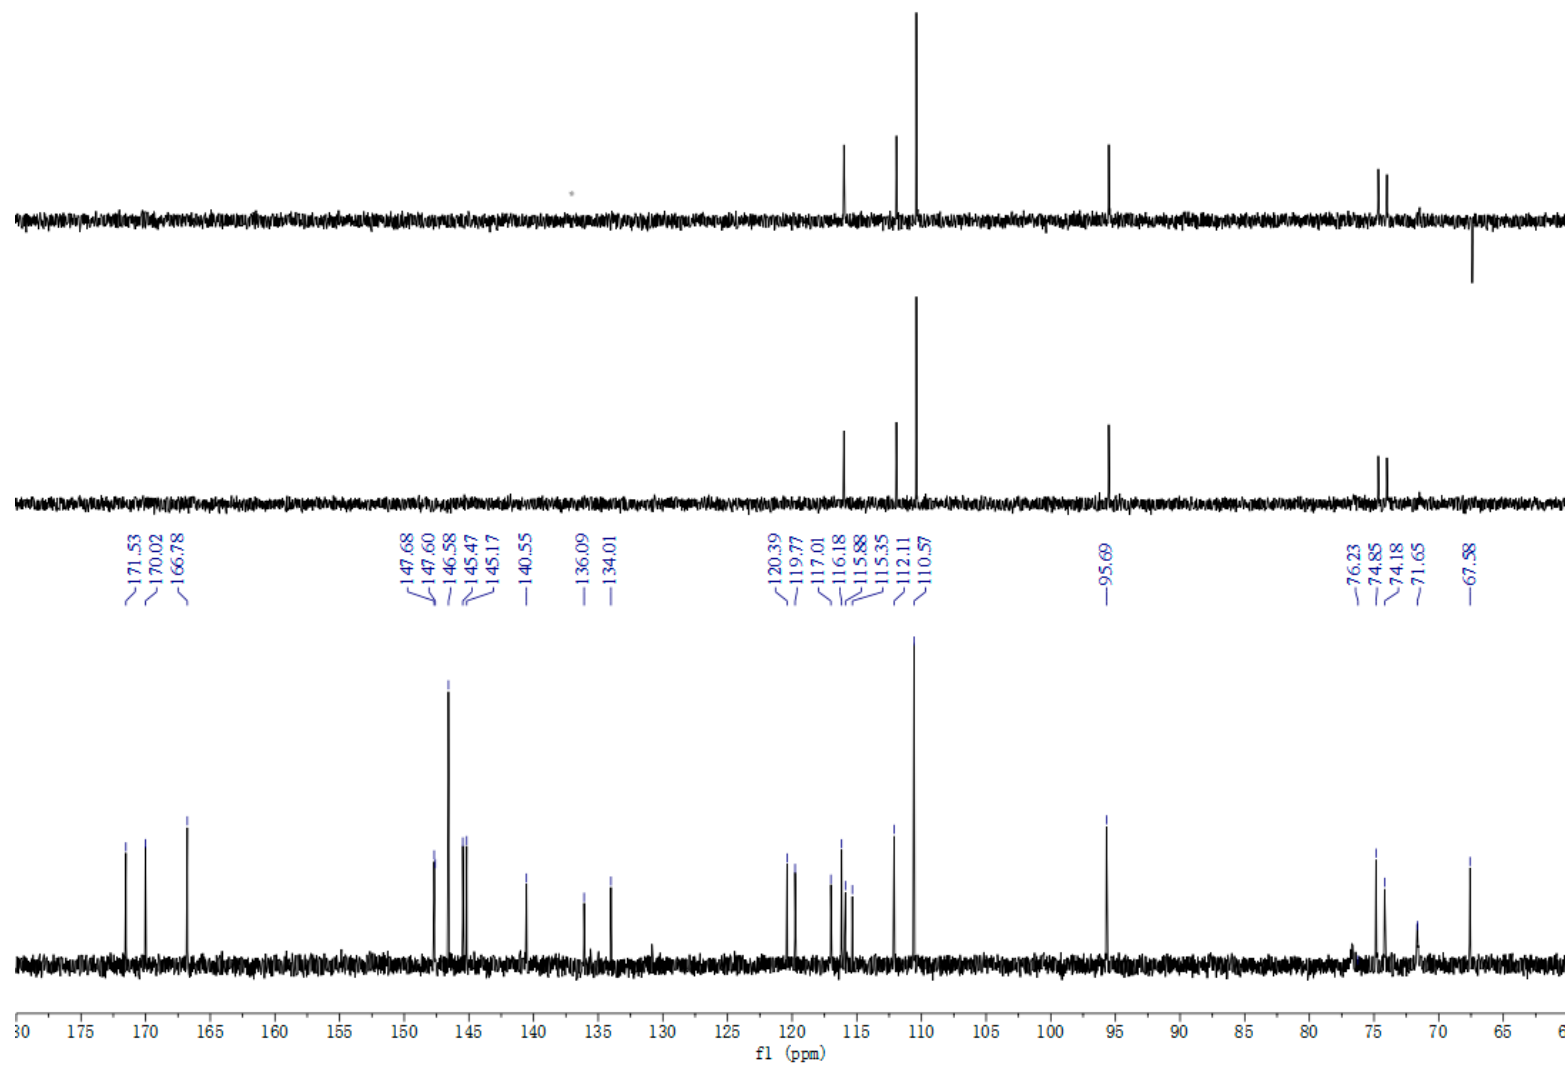

Figure S3. HSQC spectrum of compound **1** in CD<sub>3</sub>OD

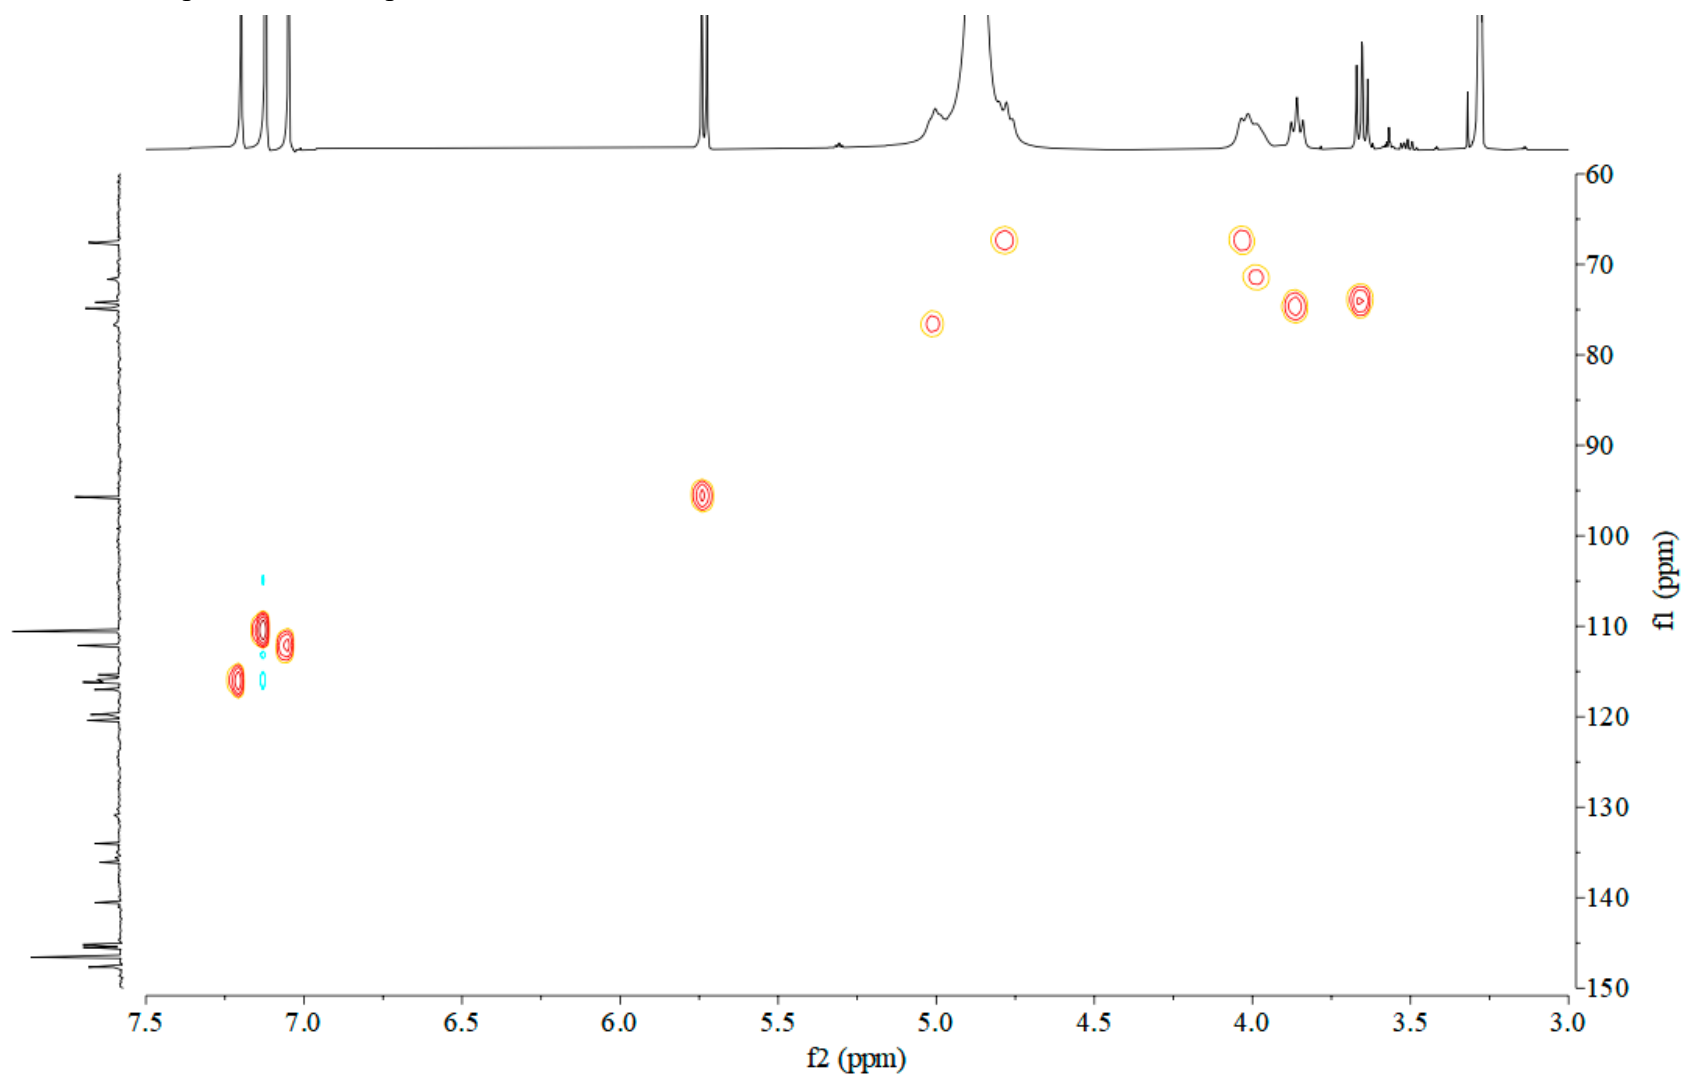

Figure S4. HMBC spectrum of compound **1** in CD<sub>3</sub>OD

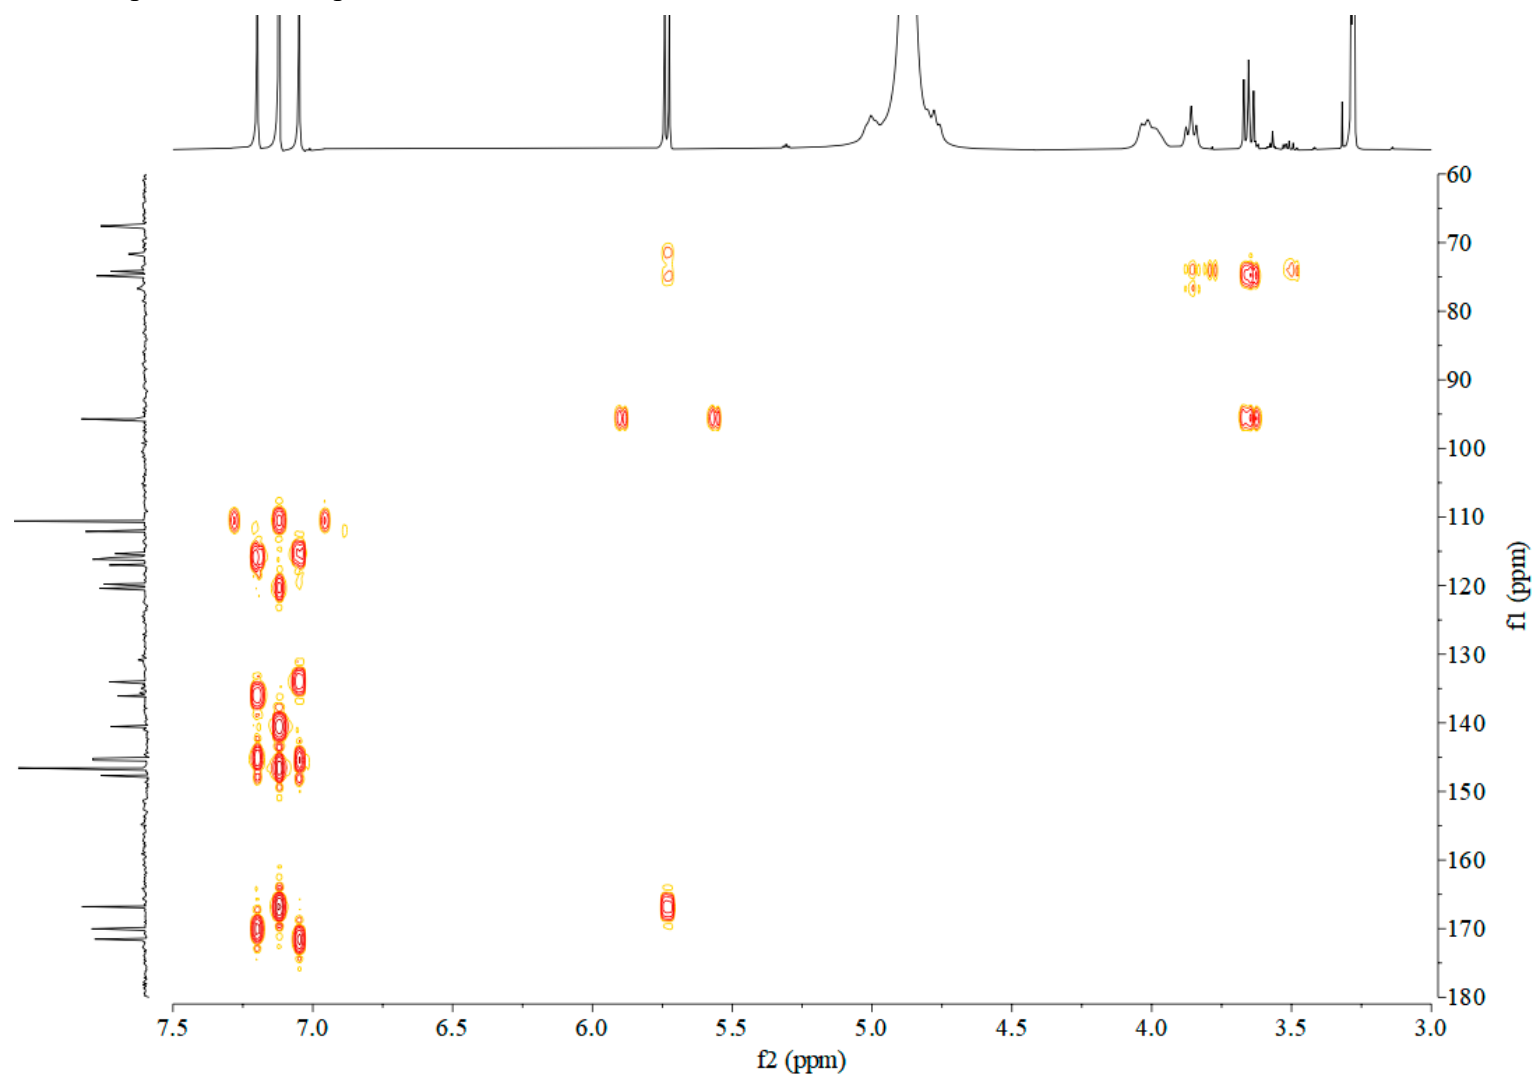

Figure S5. COSY spectrum of compound **1** in CD<sub>3</sub>OD

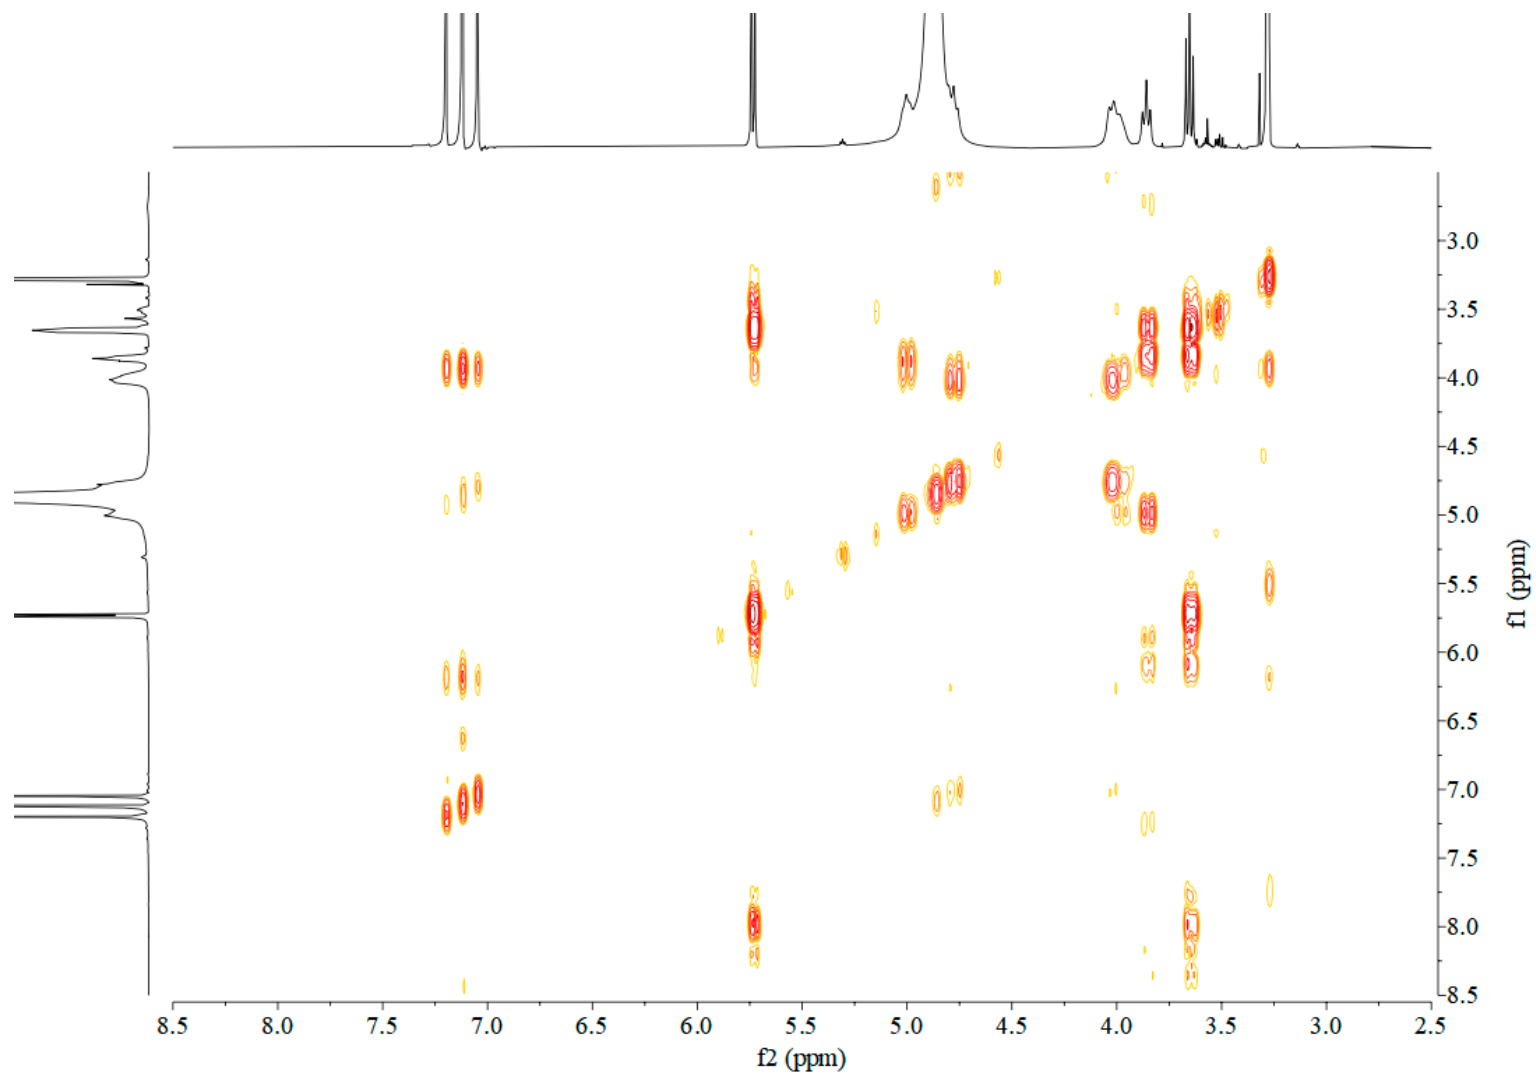

Figure S6. ROESY spectrum of compound **1** in CD<sub>3</sub>OD

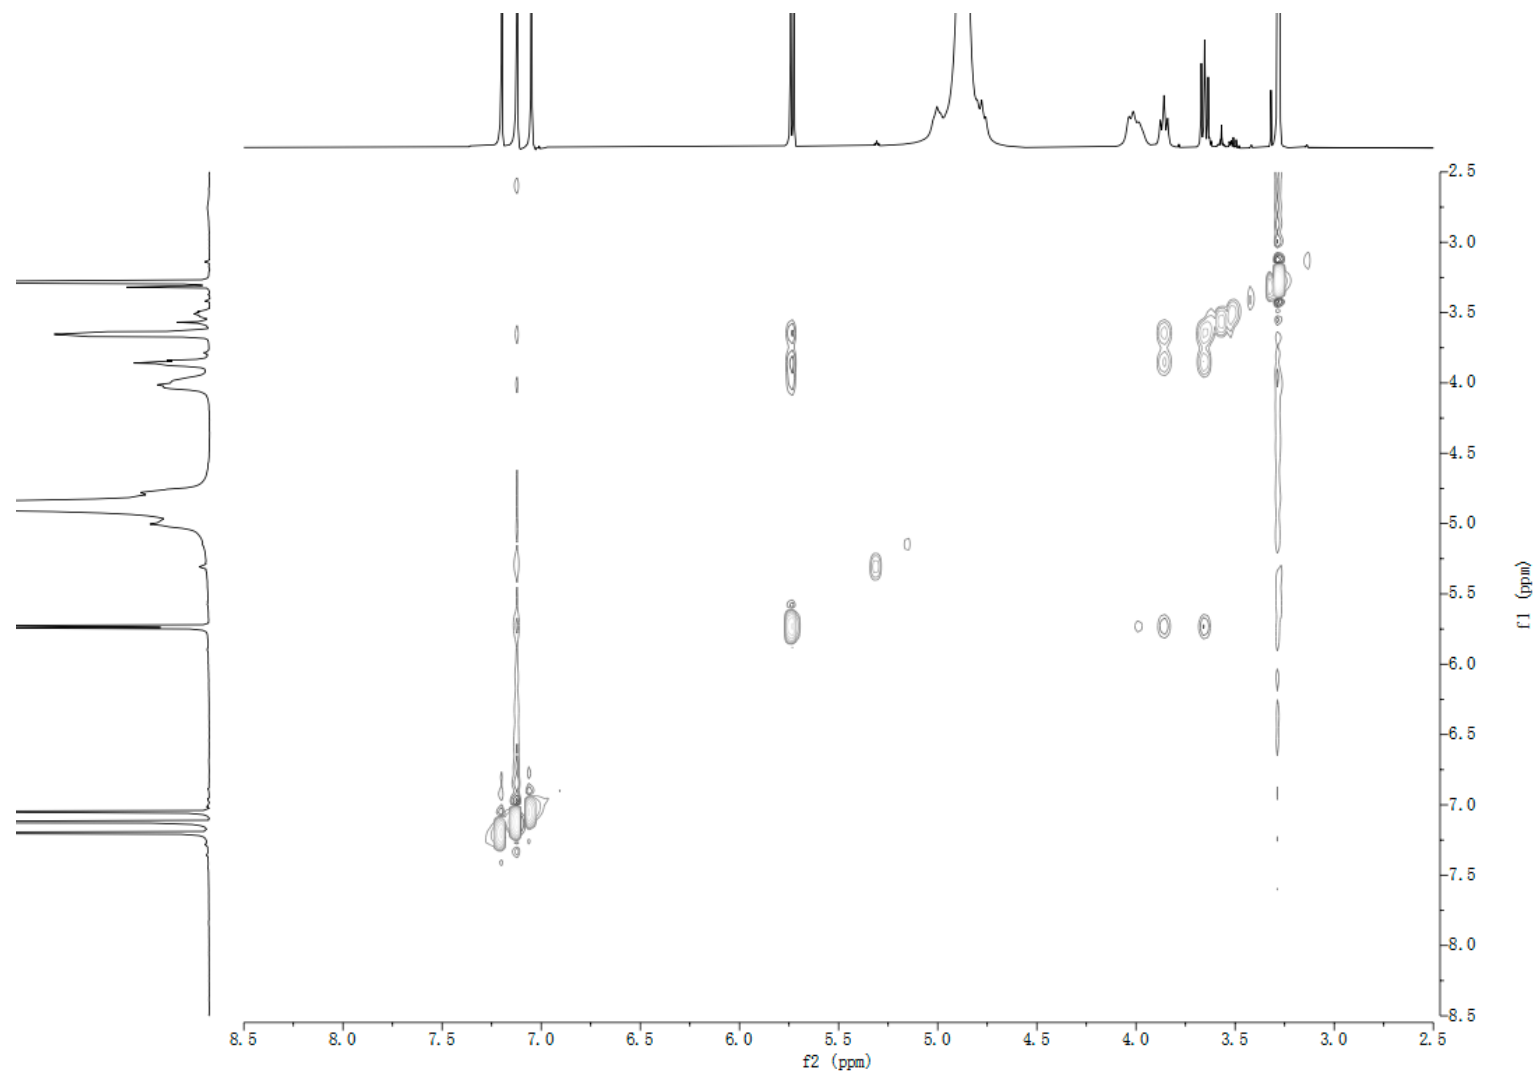

Figure S7. HRESI-MS spectrum of compound **1**

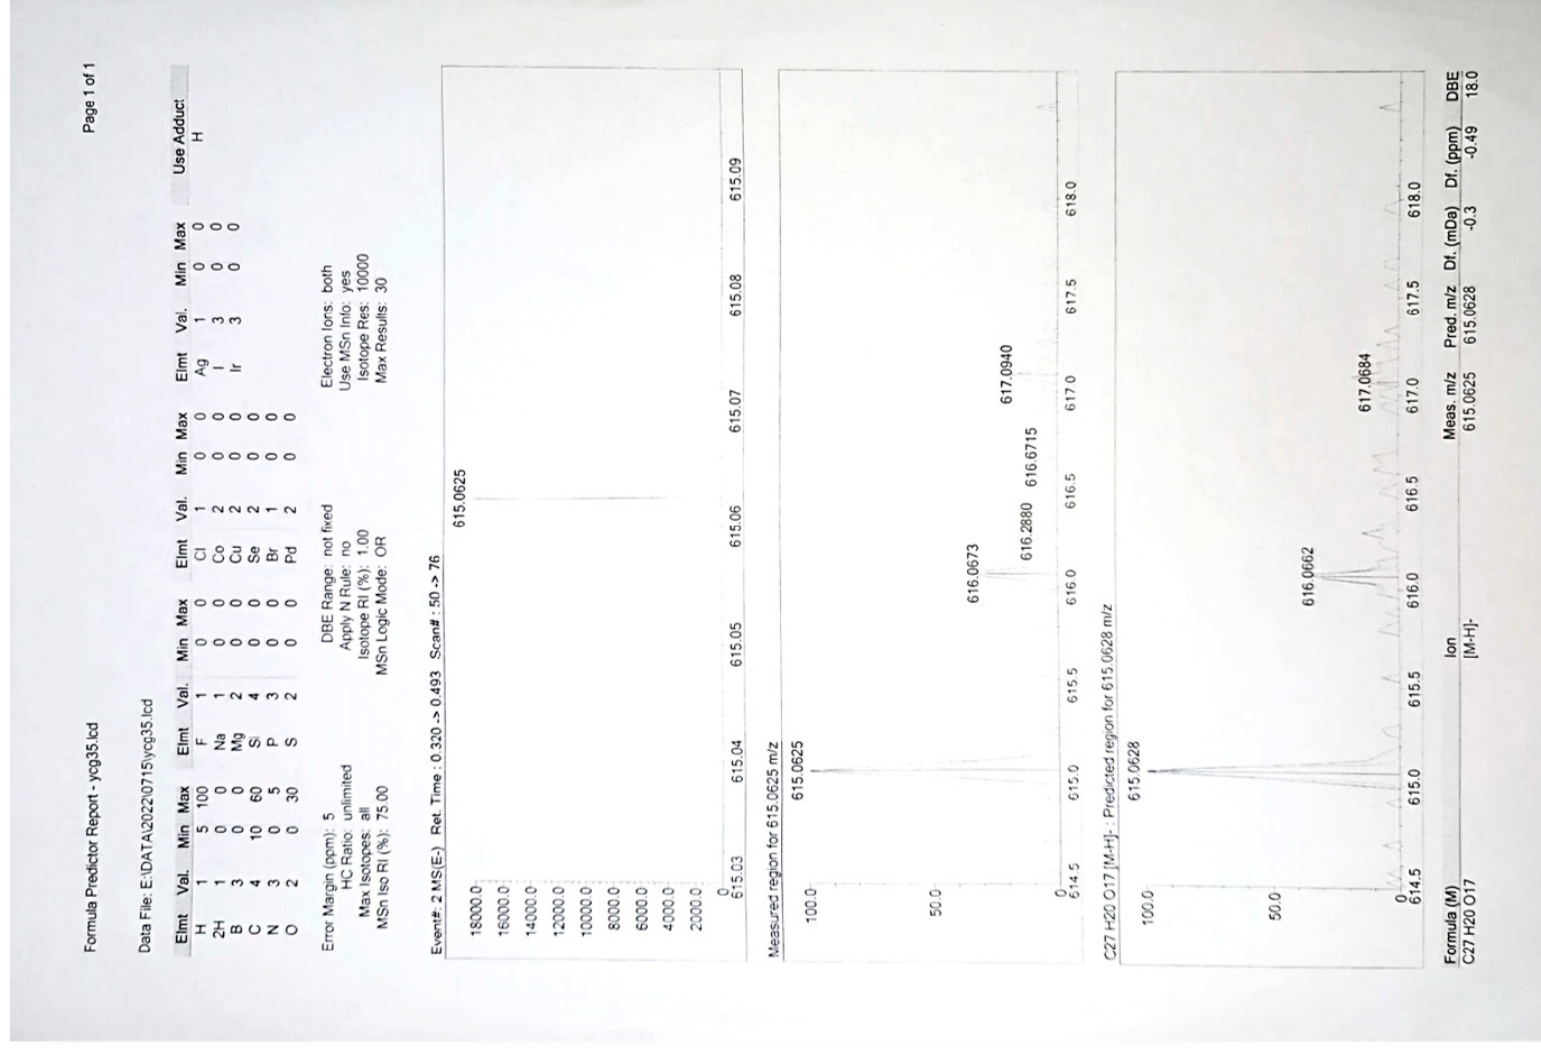

Figure S8. CD and UV spectra of compound **1** in MeOH

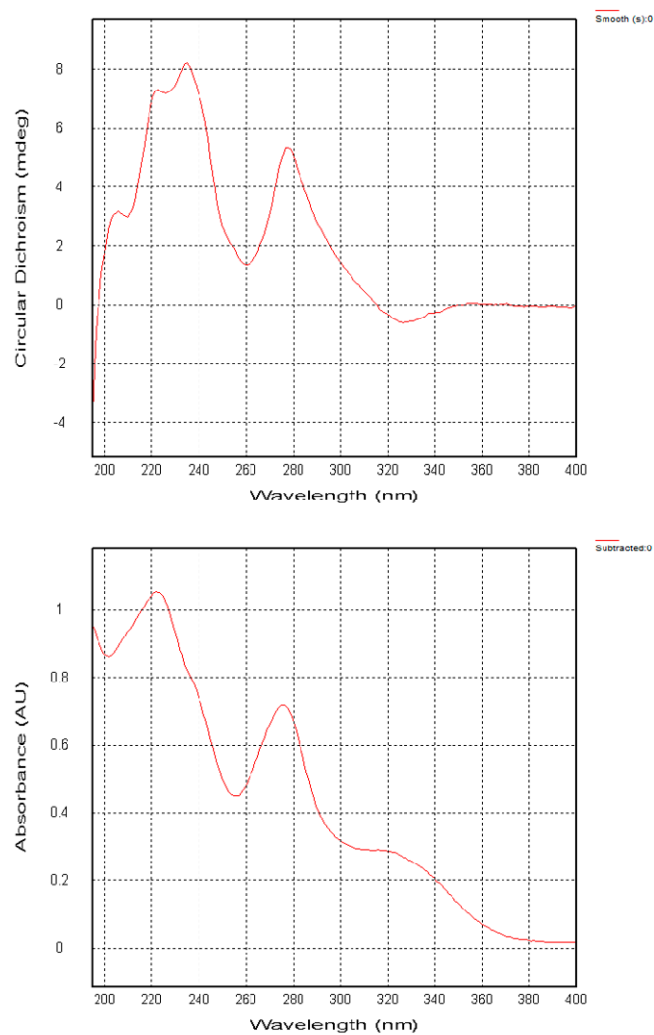

File: YCG35-1mm(195-400)22092905.dsx

ProBinaryX

Attributes :

- Time Stamp :Thu Sep 29 14:14:13 2022

- File ID : {A6D38CEA-A099-42ac-B679-26193C9FEFD4}

- Is CFR Compliant : false

- Original unaltered data

Remarks:

- User: CD

- Date: 2022/09/29

- Instrument: 0547

- DetectorType: LAAPD

- DichOS Calibration Correction Curve: 0547/2

- HV (CDDC channel): 0 v

- Time per point: 1 s

- Description: Sample 1

- Concentration: 0.2000mg/mLMeOH

- Pathlength: 1 mm

- Temperature: 20°C

Settings:

- HV

- Time-per-point: 1s (25us x 40000)

- SE

- Wavelength: 195nm - 400nm

- Step Size: 1nm

- Bandwidth: 1nm

Figure S9. OR of compound 1 in MeOH

**Rudolph Research Analytical**

This sample was measured on an Autopol VI, Serial #91058  
Manufactured by Rudolph Research Analytical, Hackettstown, NJ, USA.

Measurement Date : Wednesday, 28-SEP-2022

Set Temperature : OFF

Time Delay : Disabled

Delay between Measurement : Disabled

| <u>n</u>    | <u>Average</u>   | <u>Std.Dev.</u> | <u>% RSD</u>  | <u>Maximum</u> | <u>Minimum</u> |               |              |                     |              |  |
|-------------|------------------|-----------------|---------------|----------------|----------------|---------------|--------------|---------------------|--------------|--|
| 5           | 34.40            | 0.55            | 1.59          | 35.00          | 34.00          |               |              |                     |              |  |
| <u>S.No</u> | <u>Sample ID</u> | <u>Time</u>     | <u>Result</u> | <u>Scale</u>   | <u>OR °Arc</u> | <u>WLG.nm</u> | <u>Lg.mm</u> | <u>Conc.g/100ml</u> | <u>Temp.</u> |  |
| 1           | YCG35            | 04:48:48 PM     | 35.00         | SR             | 0.035          | 589           | 100.00       | 0.100               | 23.6         |  |
| 2           | YCG35            | 04:48:54 PM     | 35.00         | SR             | 0.035          | 589           | 100.00       | 0.100               | 23.6         |  |
| 3           | YCG35            | 04:49:01 PM     | 34.00         | SR             | 0.034          | 589           | 100.00       | 0.100               | 23.6         |  |
| 4           | YCG35            | 04:49:07 PM     | 34.00         | SR             | 0.034          | 589           | 100.00       | 0.100               | 23.6         |  |
| 5           | YCG35            | 04:49:13 PM     | 34.00         | SR             | 0.034          | 589           | 100.00       | 0.100               | 23.6         |  |

Figure S10. Previous studies on the oxidative coupling of galloyl groups

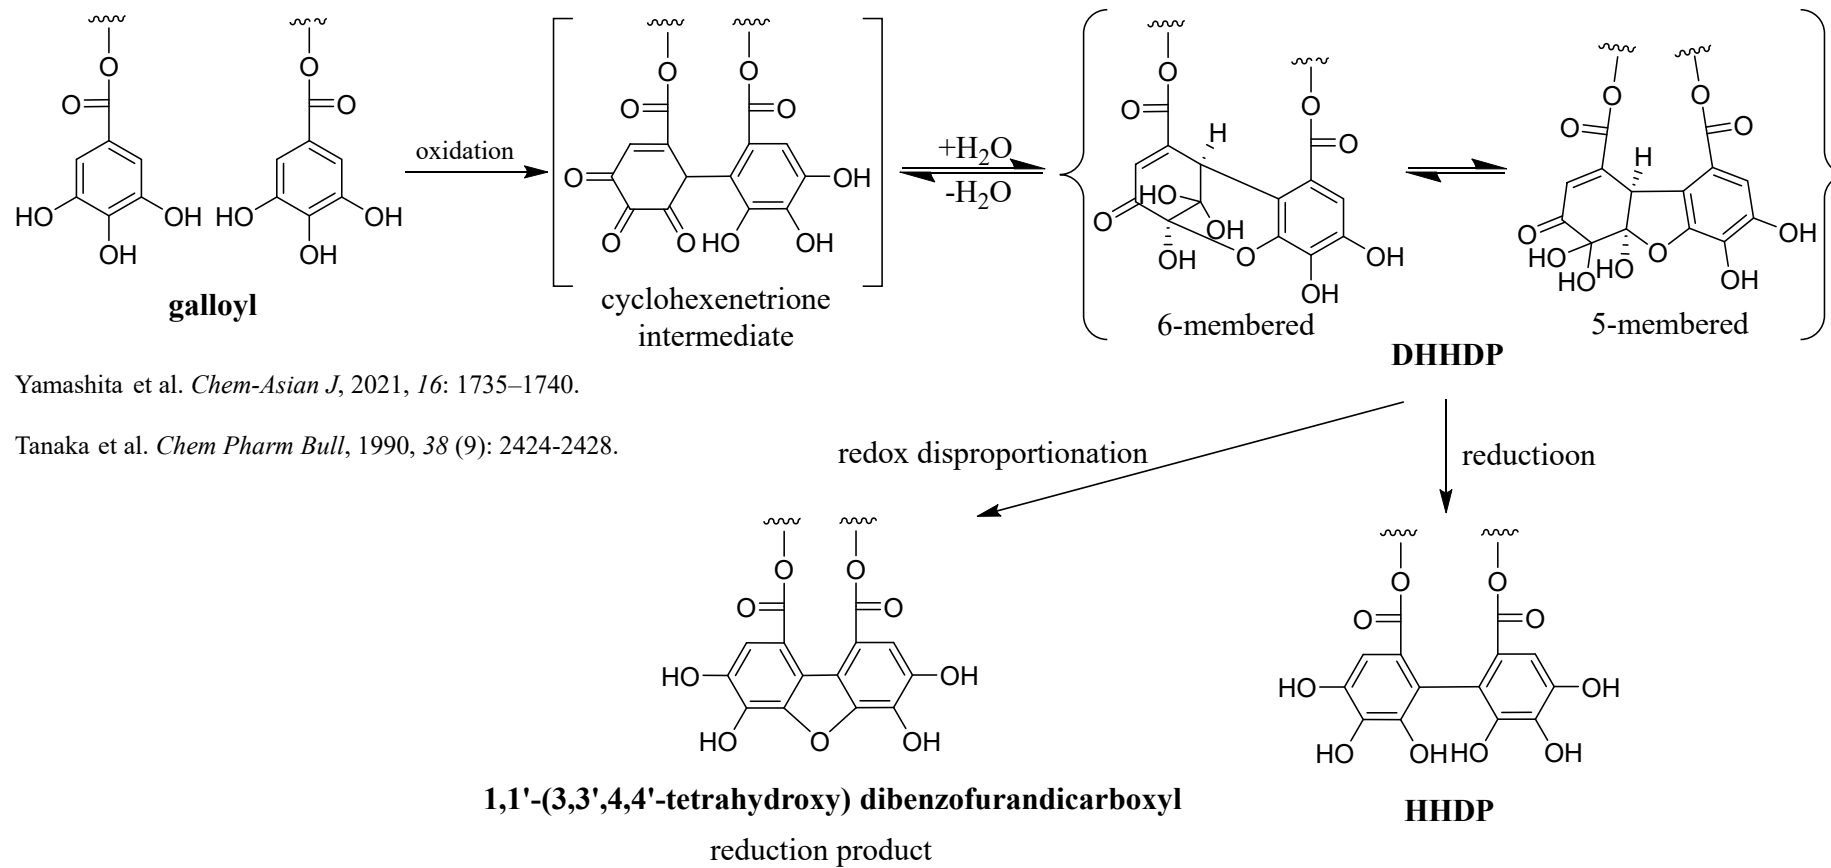

Yamashita et al. *Chem-Asian J*, 2021, 16: 1735–1740.

Tanaka et al. *Chem Pharm Bull*, 1990, 38 (9): 2424-2428.

Figure S11.  $^1\text{H}$  NMR spectrum of compound **2** in  $\text{CD}_3\text{OD}$

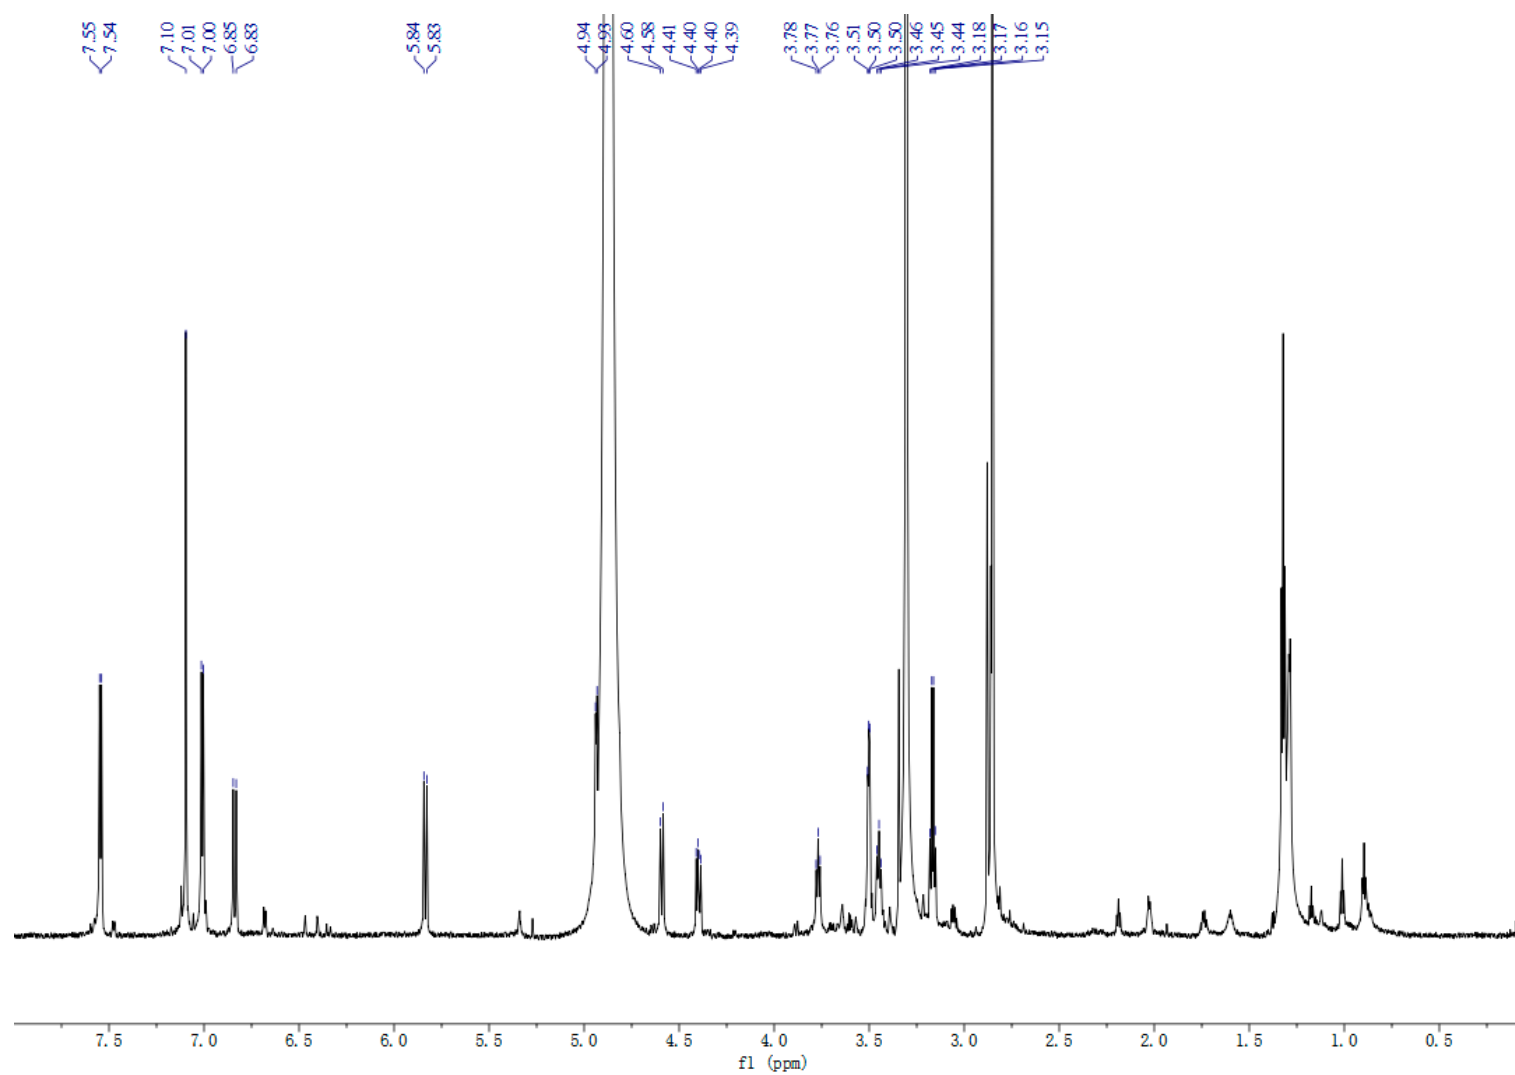

Figure S12.  $^{13}\text{C}$  NMR spectrum of compound **2** in  $\text{CD}_3\text{OD}$

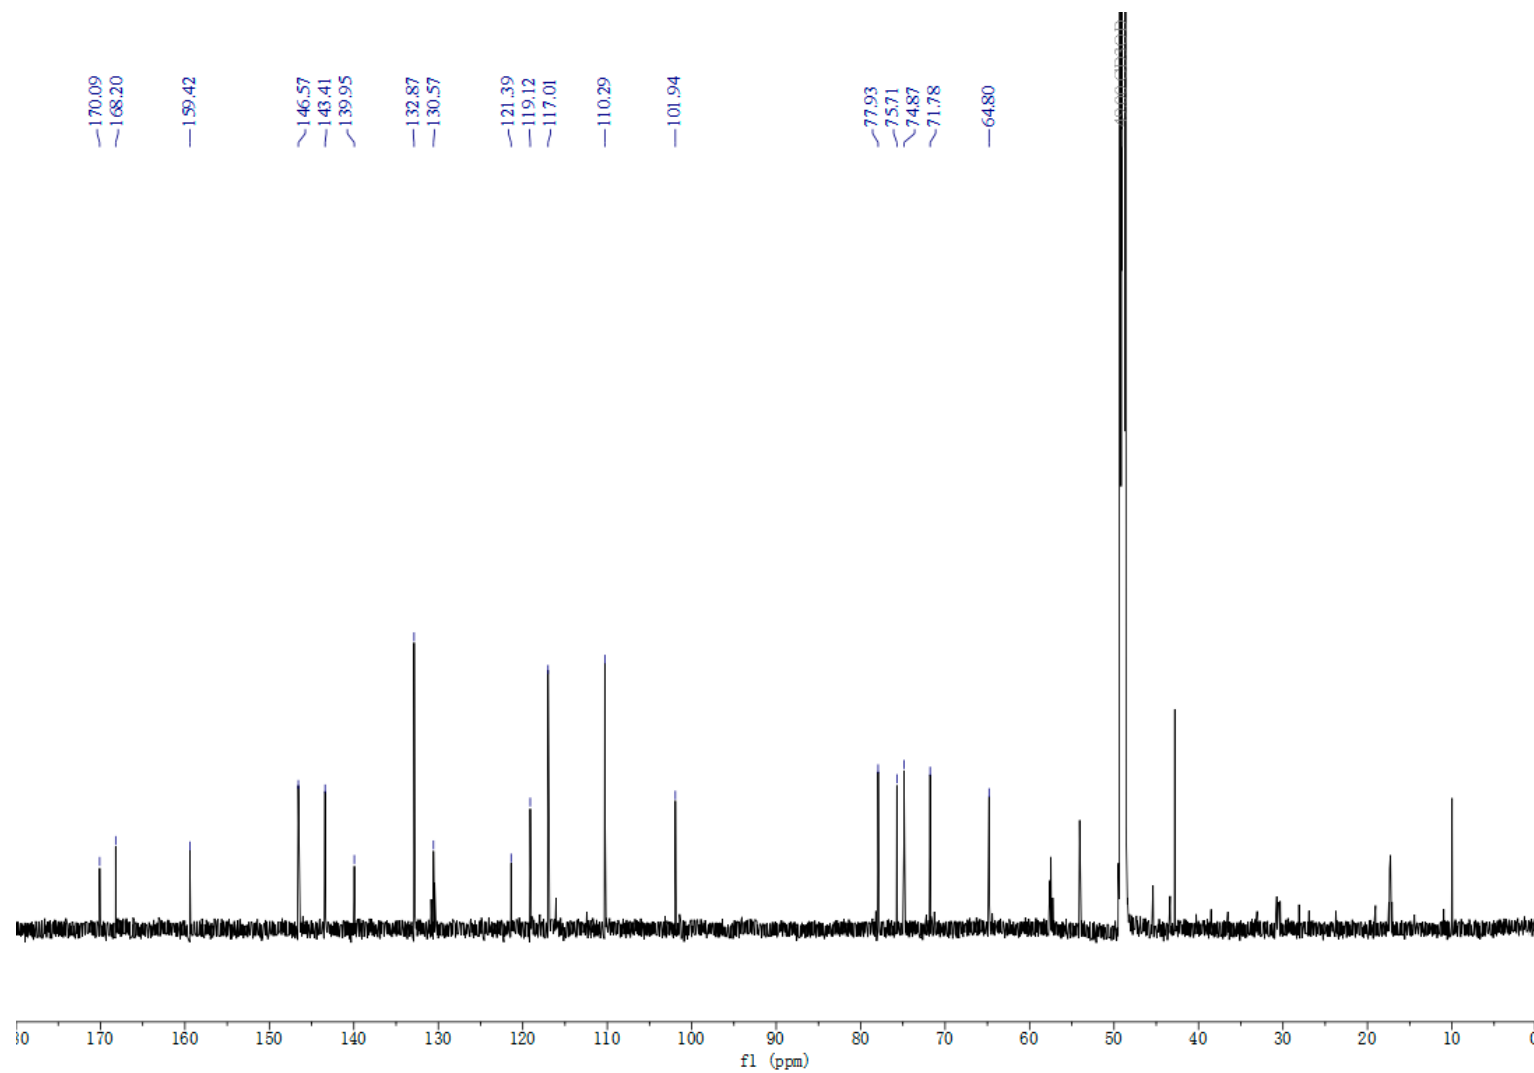

Figure S13.  $^1\text{H}$  NMR spectrum of compound **3** in  $\text{CD}_3\text{OD}$

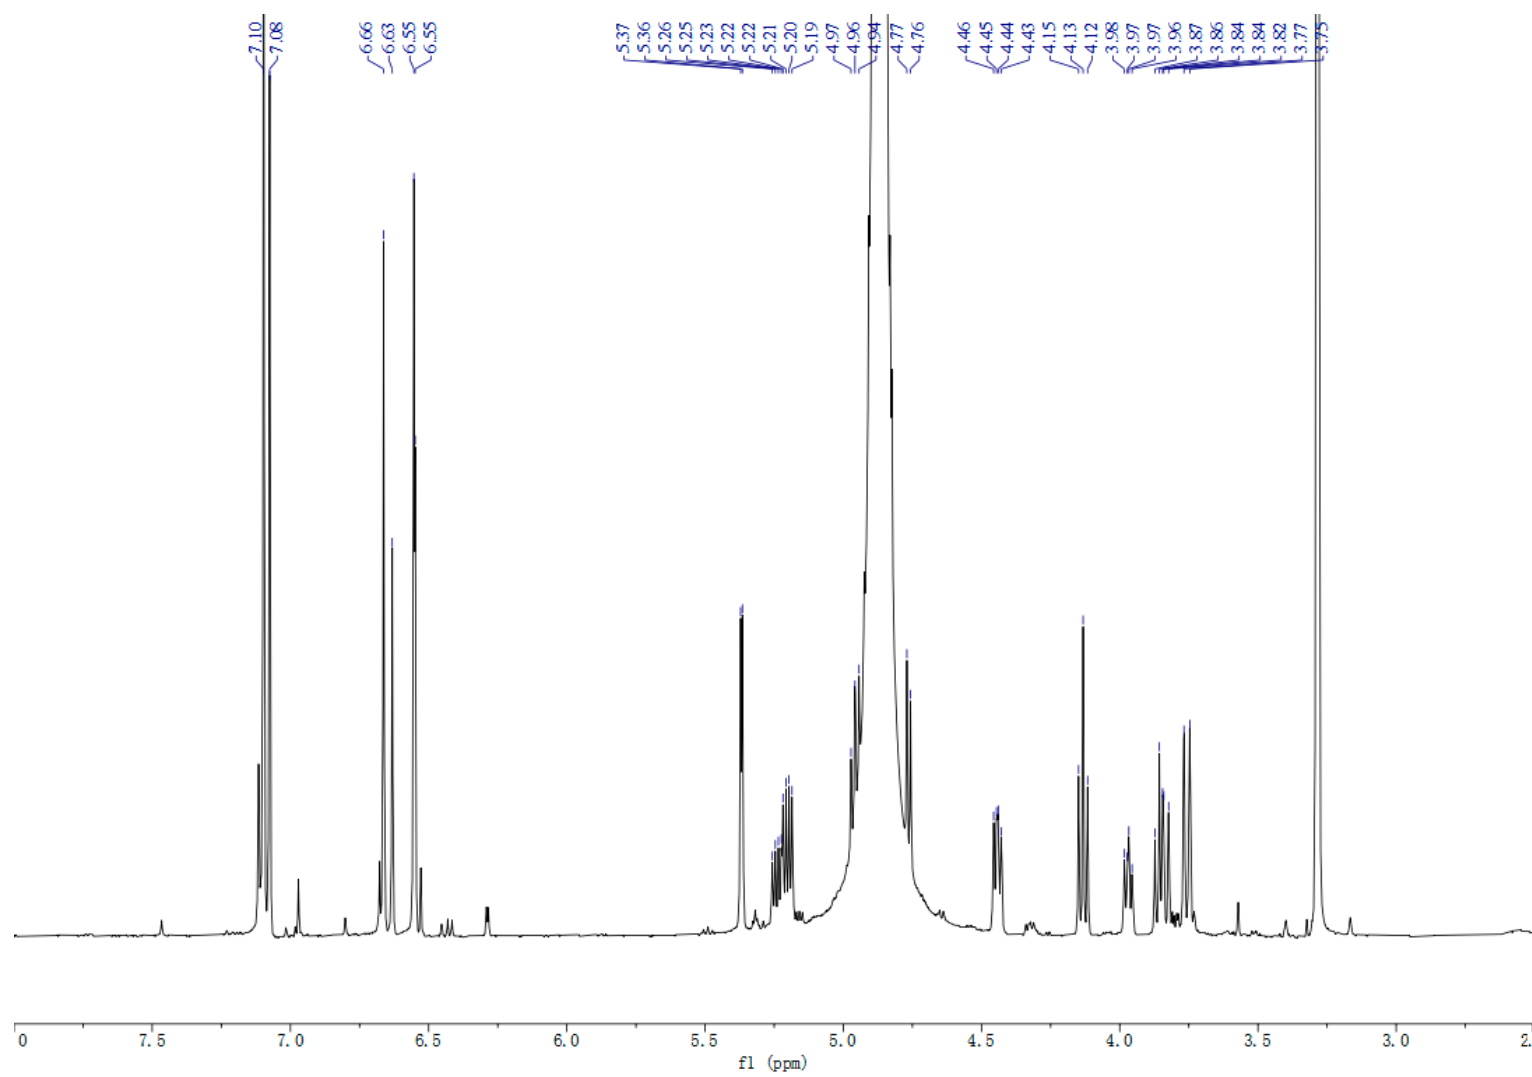

Figure S14.  $^{13}\text{C}$  NMR spectrum of compound **3** in  $\text{CD}_3\text{OD}$

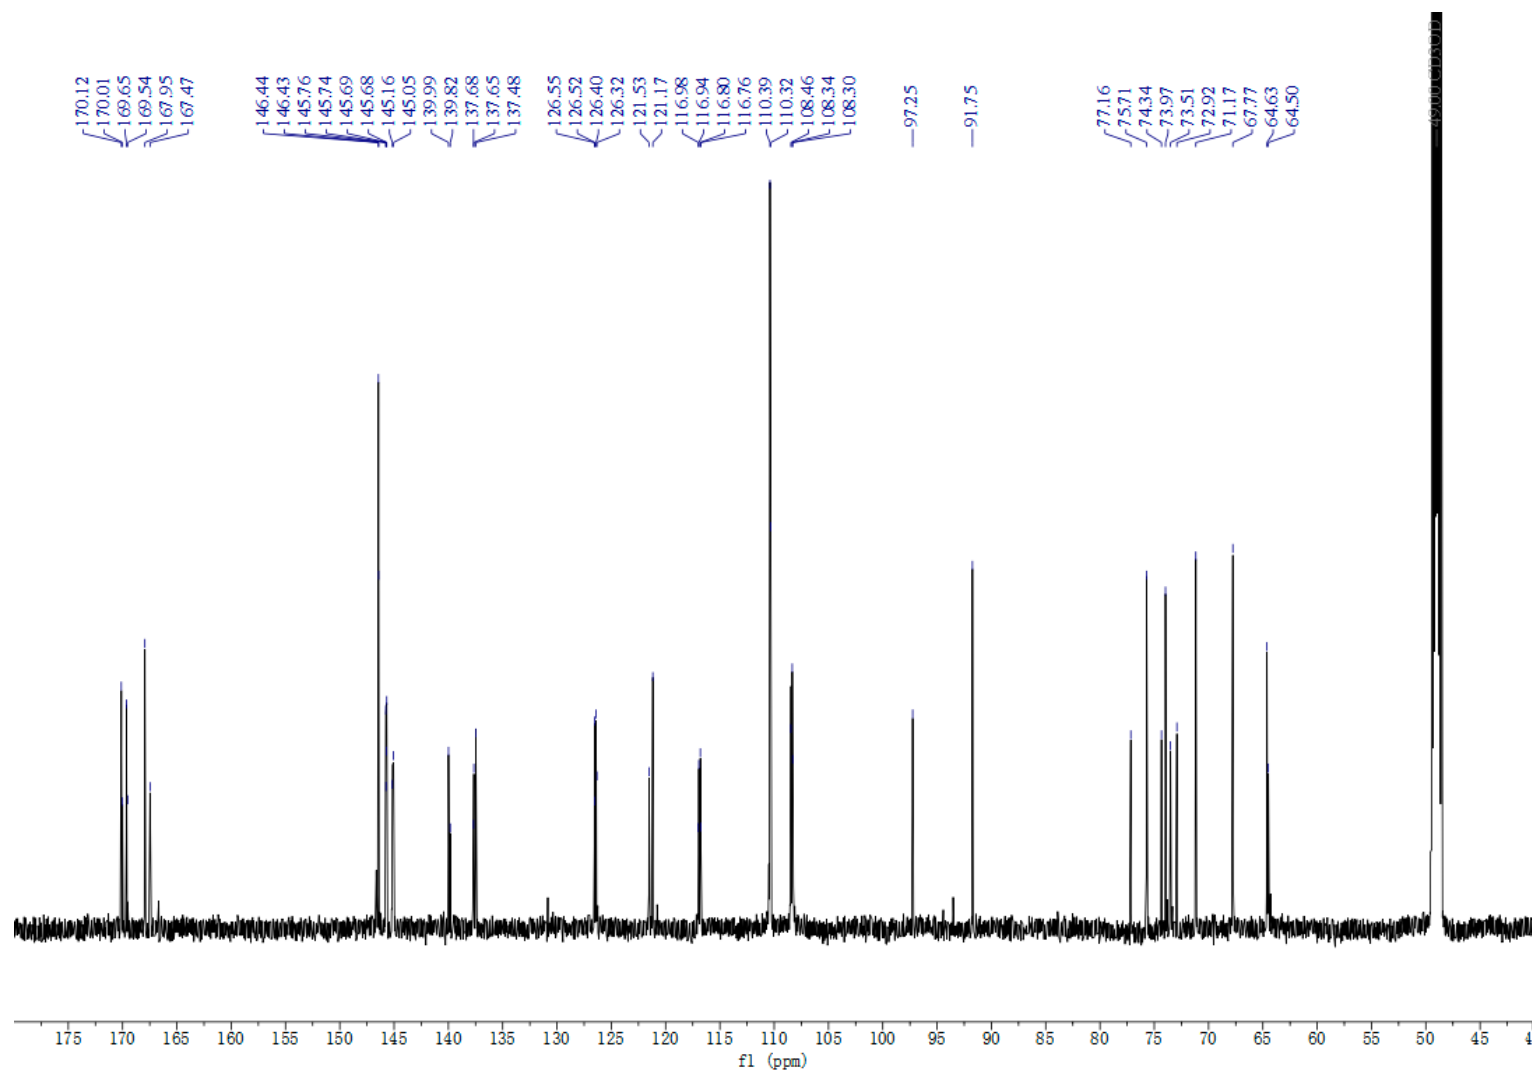

Figure S15.  $^1\text{H}$  NMR spectrum of compound **4** in  $\text{CD}_3\text{OD}$

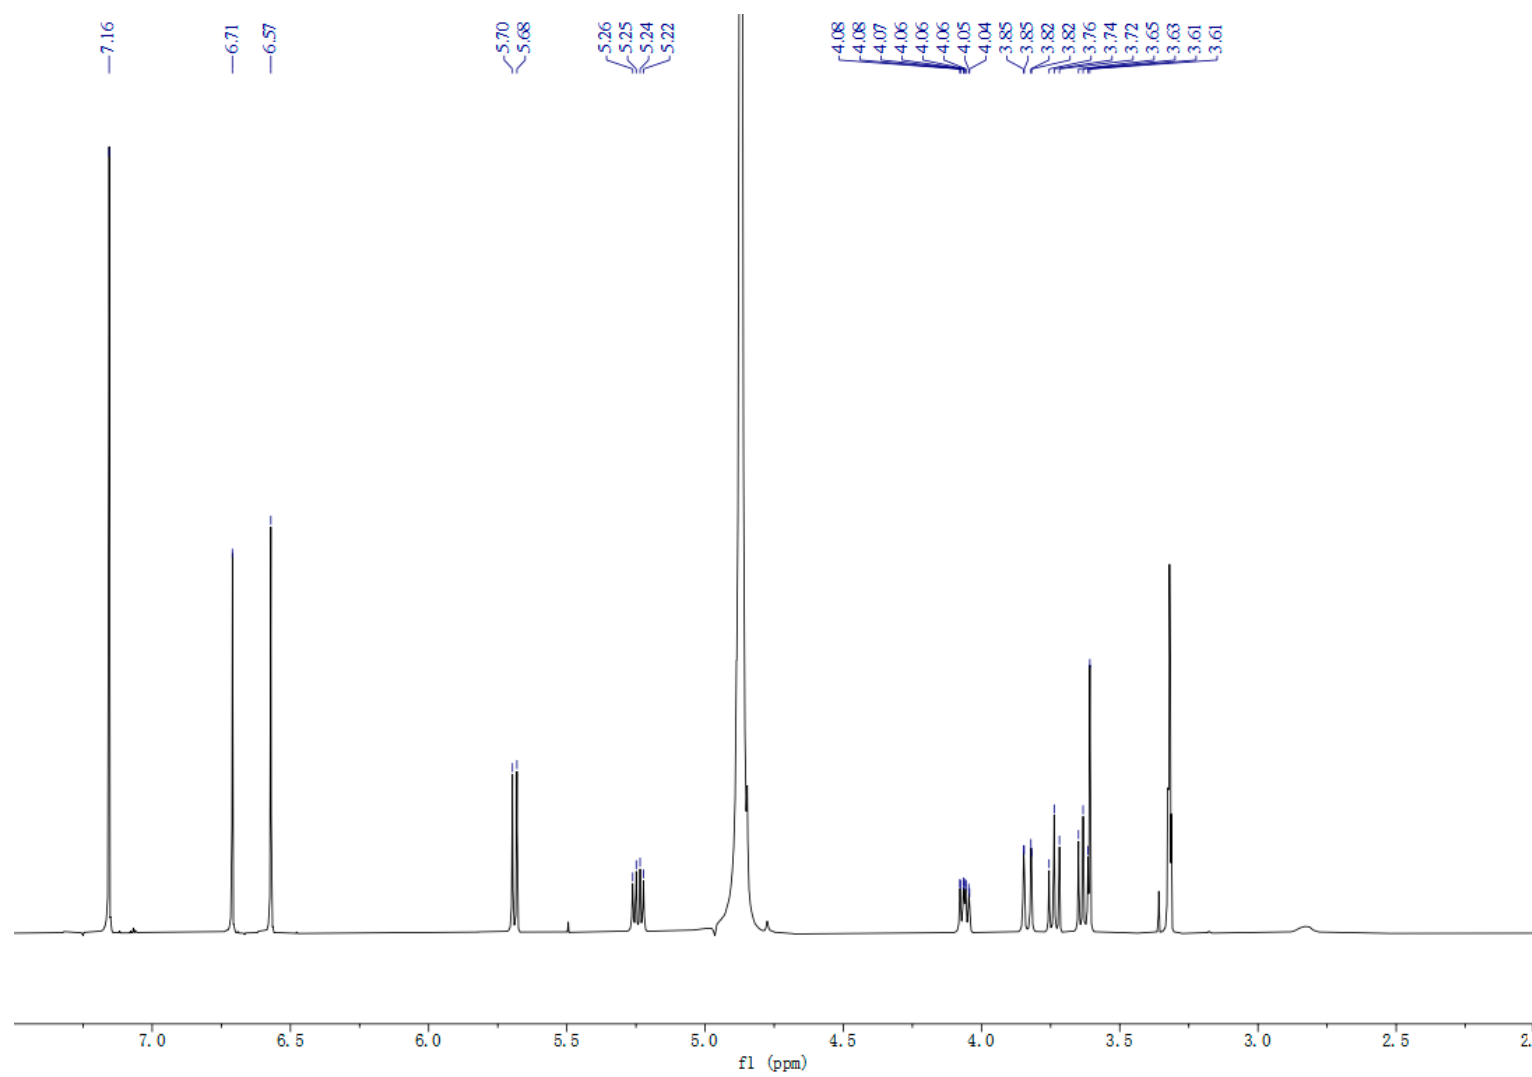

Figure S16.  $^{13}\text{C}$  NMR spectrum of compound **4** in  $\text{CD}_3\text{OD}$

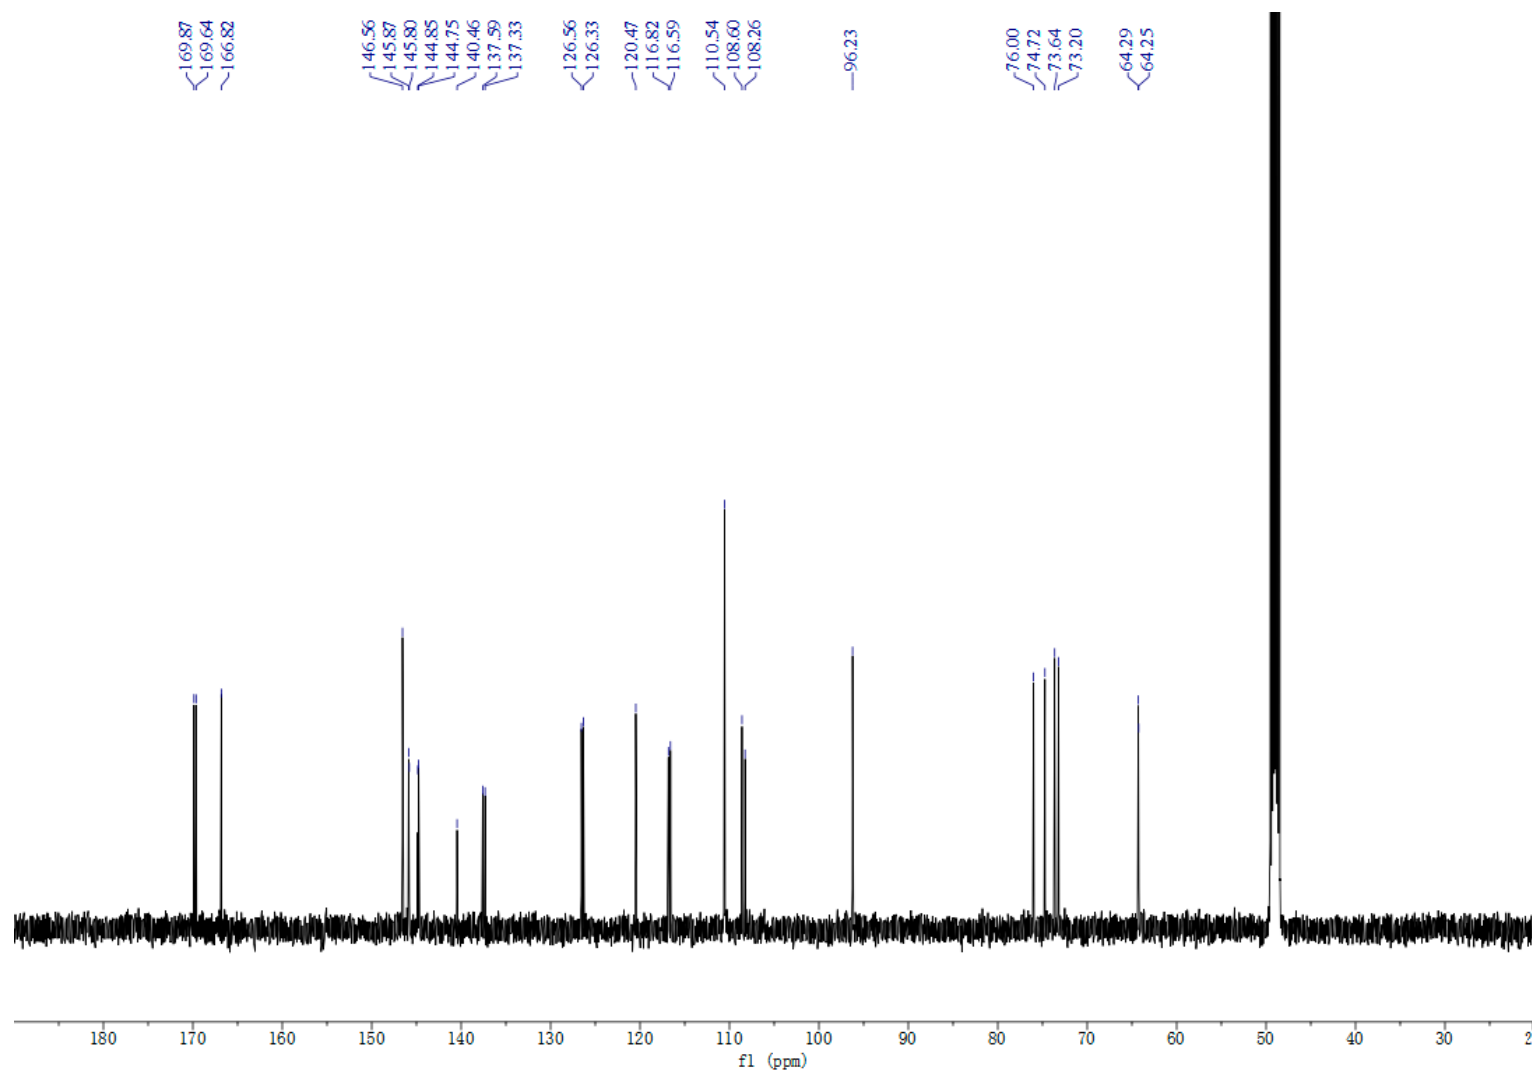

Figure S17.  $^1\text{H}$  NMR spectrum of compound **5** in  $\text{CD}_3\text{OD}$

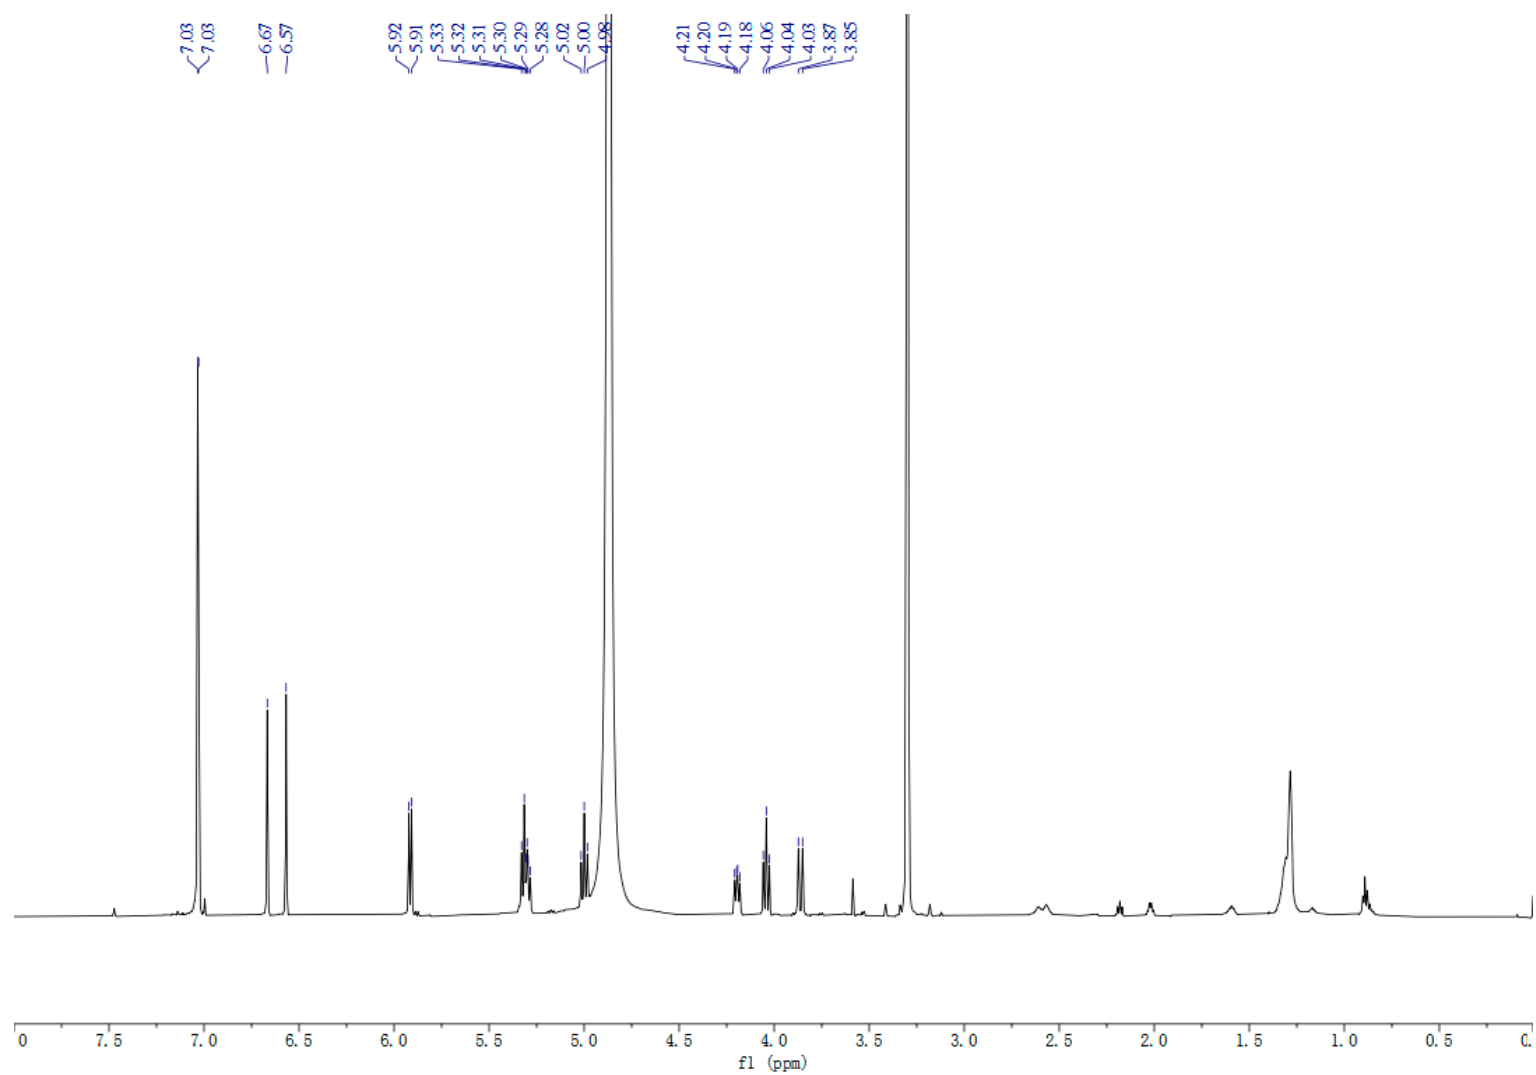

Figure S18.  $^{13}\text{C}$  NMR spectrum of compound **5** in  $\text{CD}_3\text{OD}$

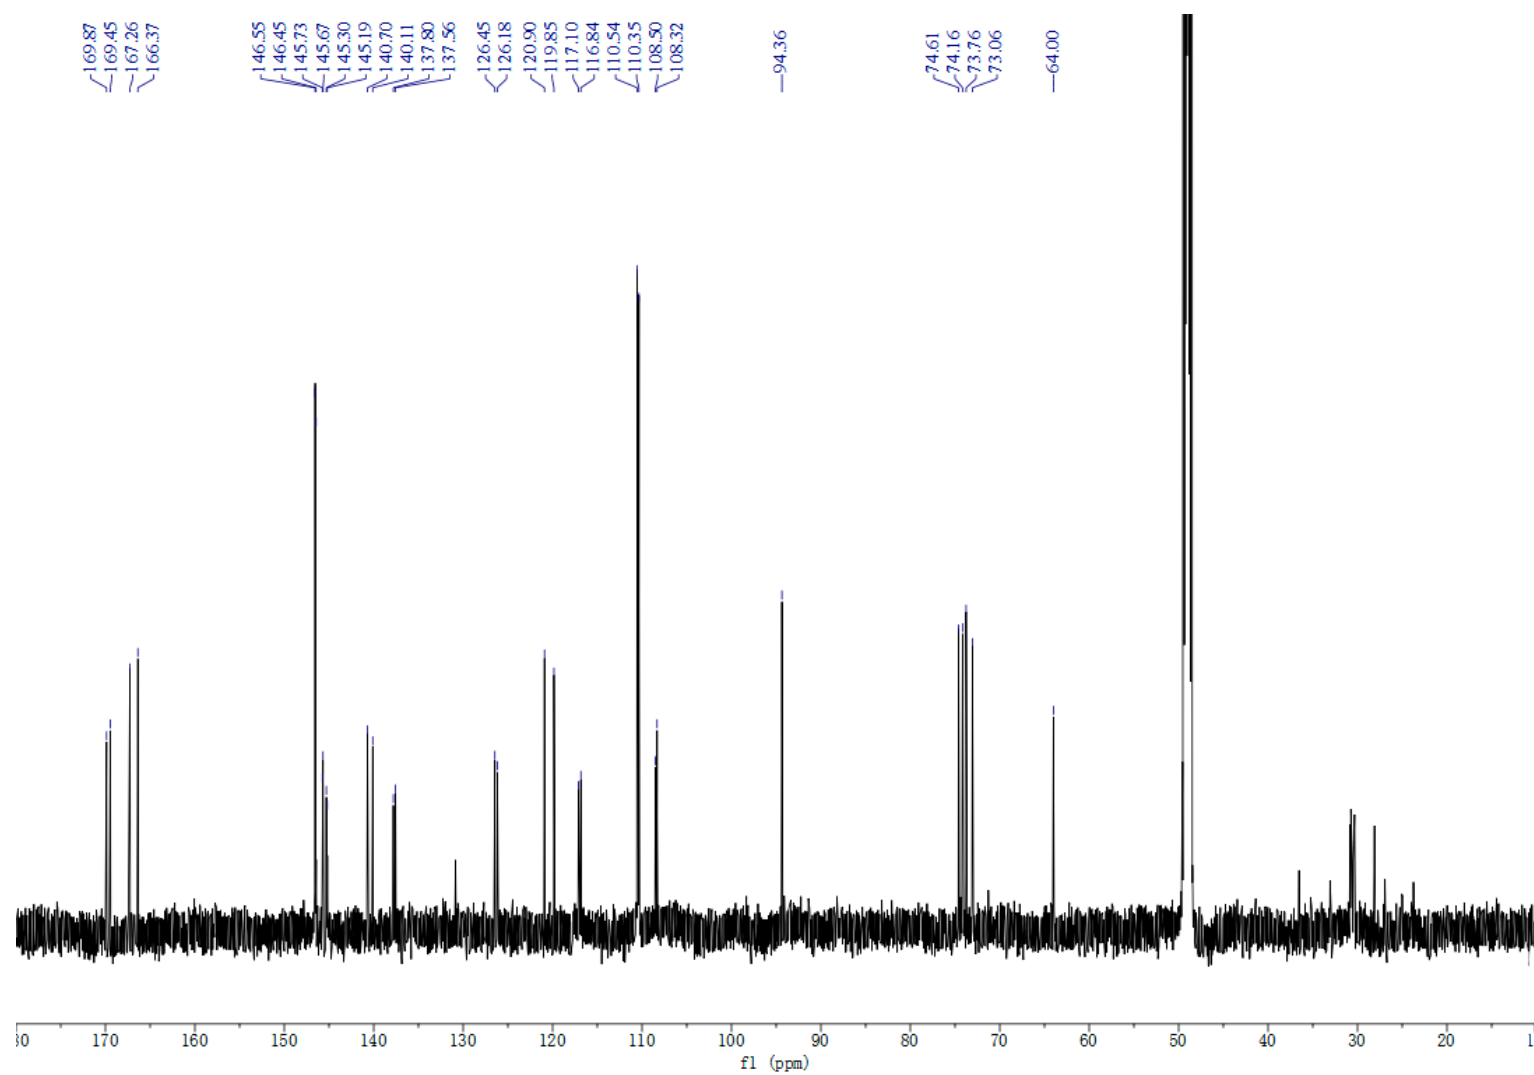

Figure S19.  $^1\text{H}$  NMR spectrum of compound **6** in  $\text{CD}_3\text{OD}$

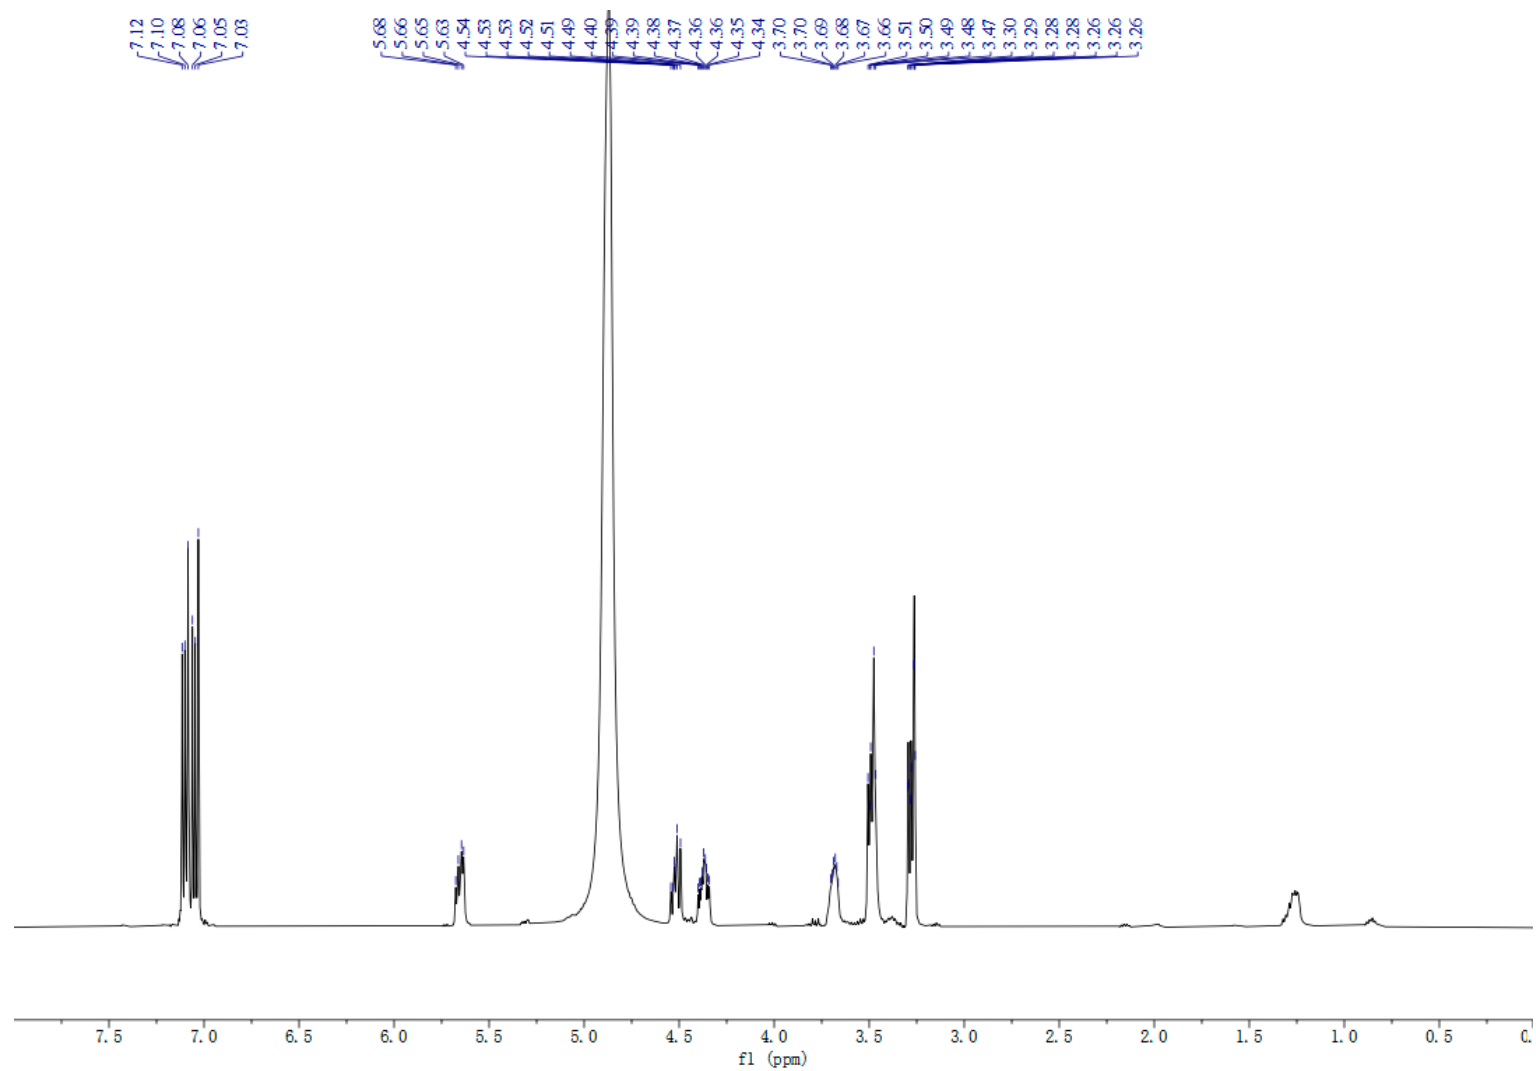

Figure S20.  $^{13}\text{C}$  NMR spectrum of compound **6** in  $\text{CD}_3\text{OD}$

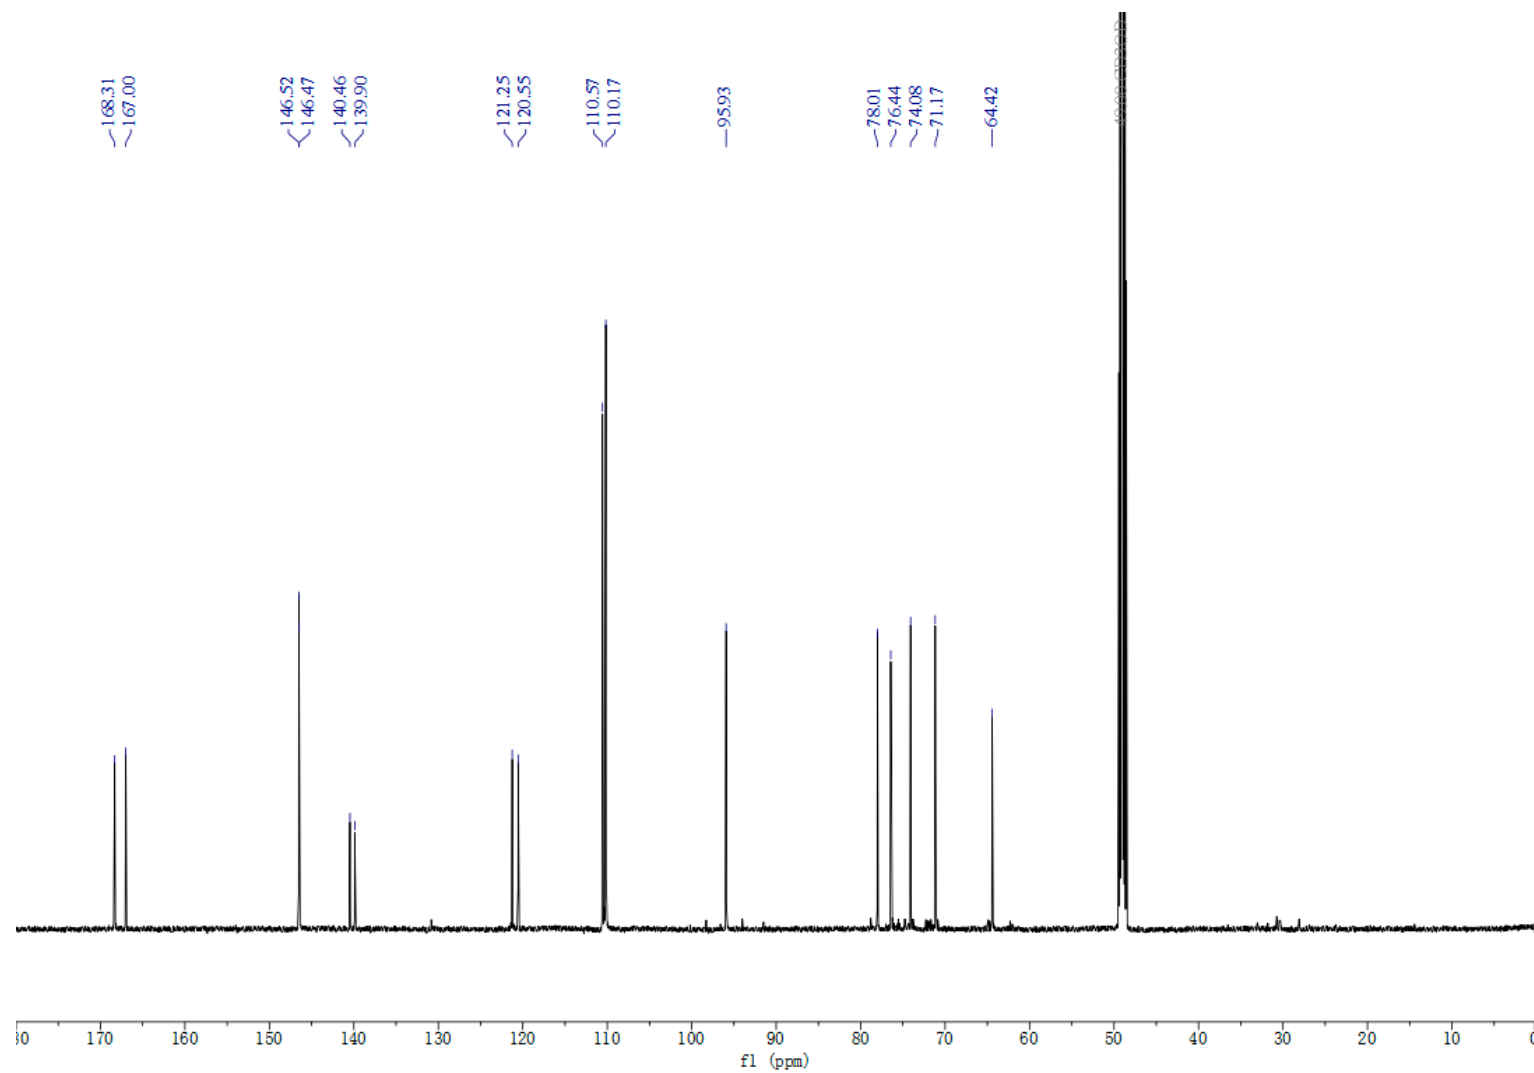

Figure S21.  $^1\text{H}$  NMR spectrum of compound **7** in  $\text{CD}_3\text{OD}$

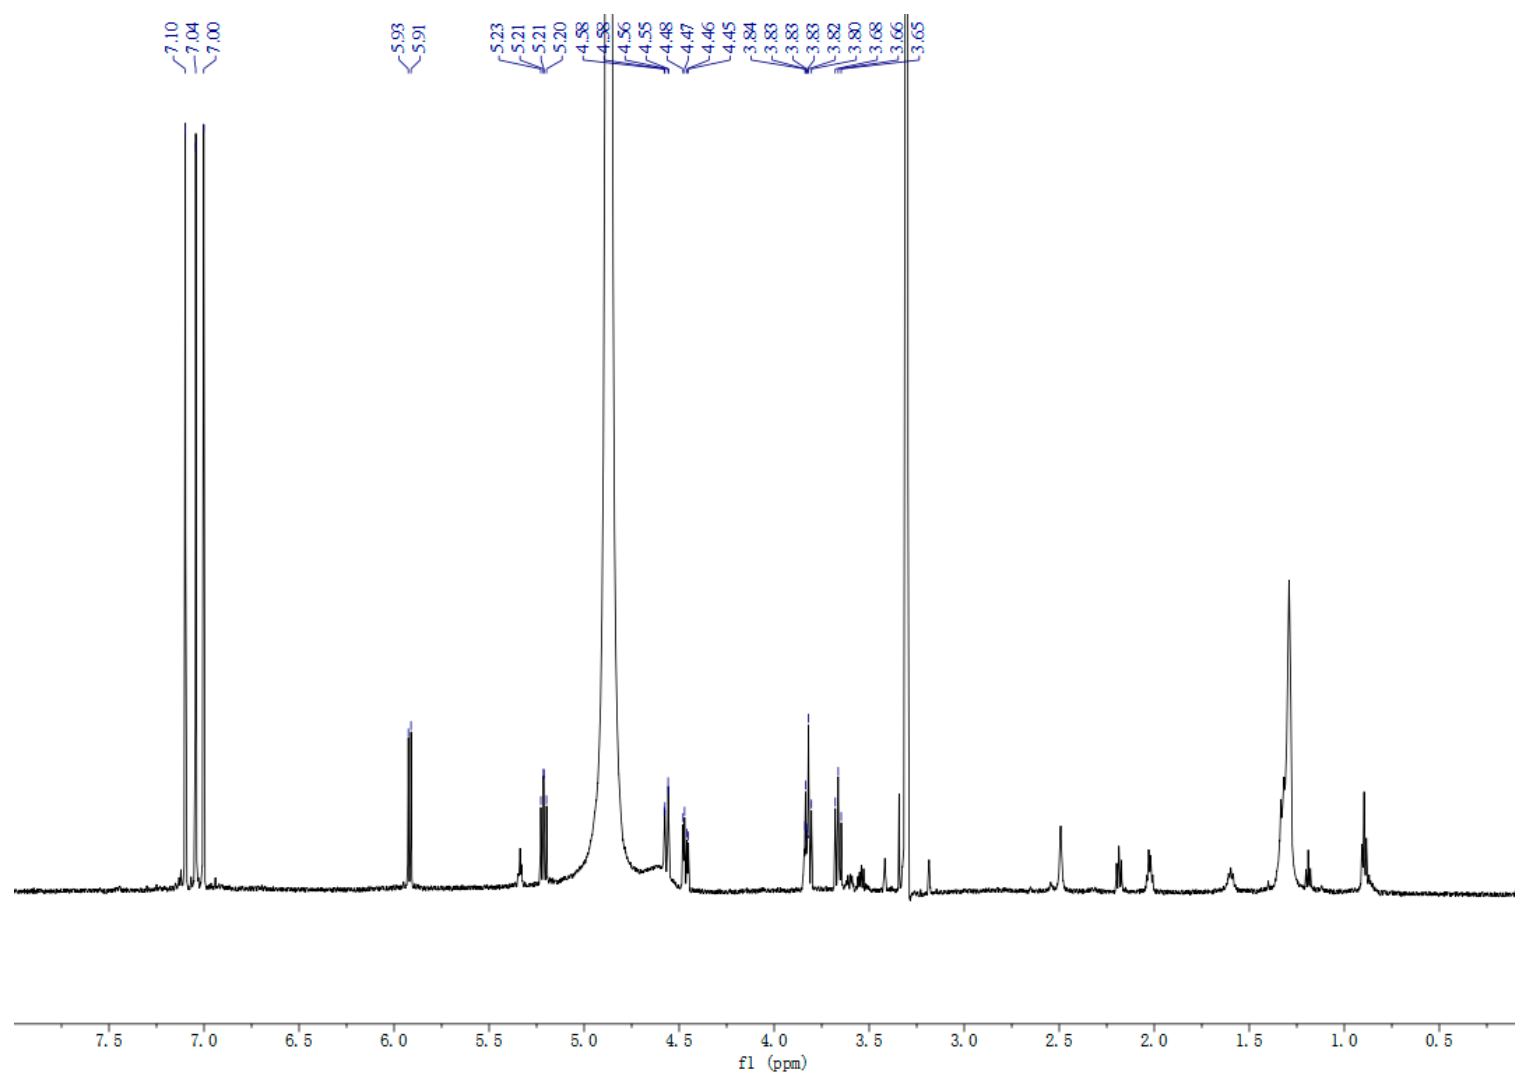

Figure S22.  $^{13}\text{C}$  NMR spectrum of compound **7** in  $\text{CD}_3\text{OD}$

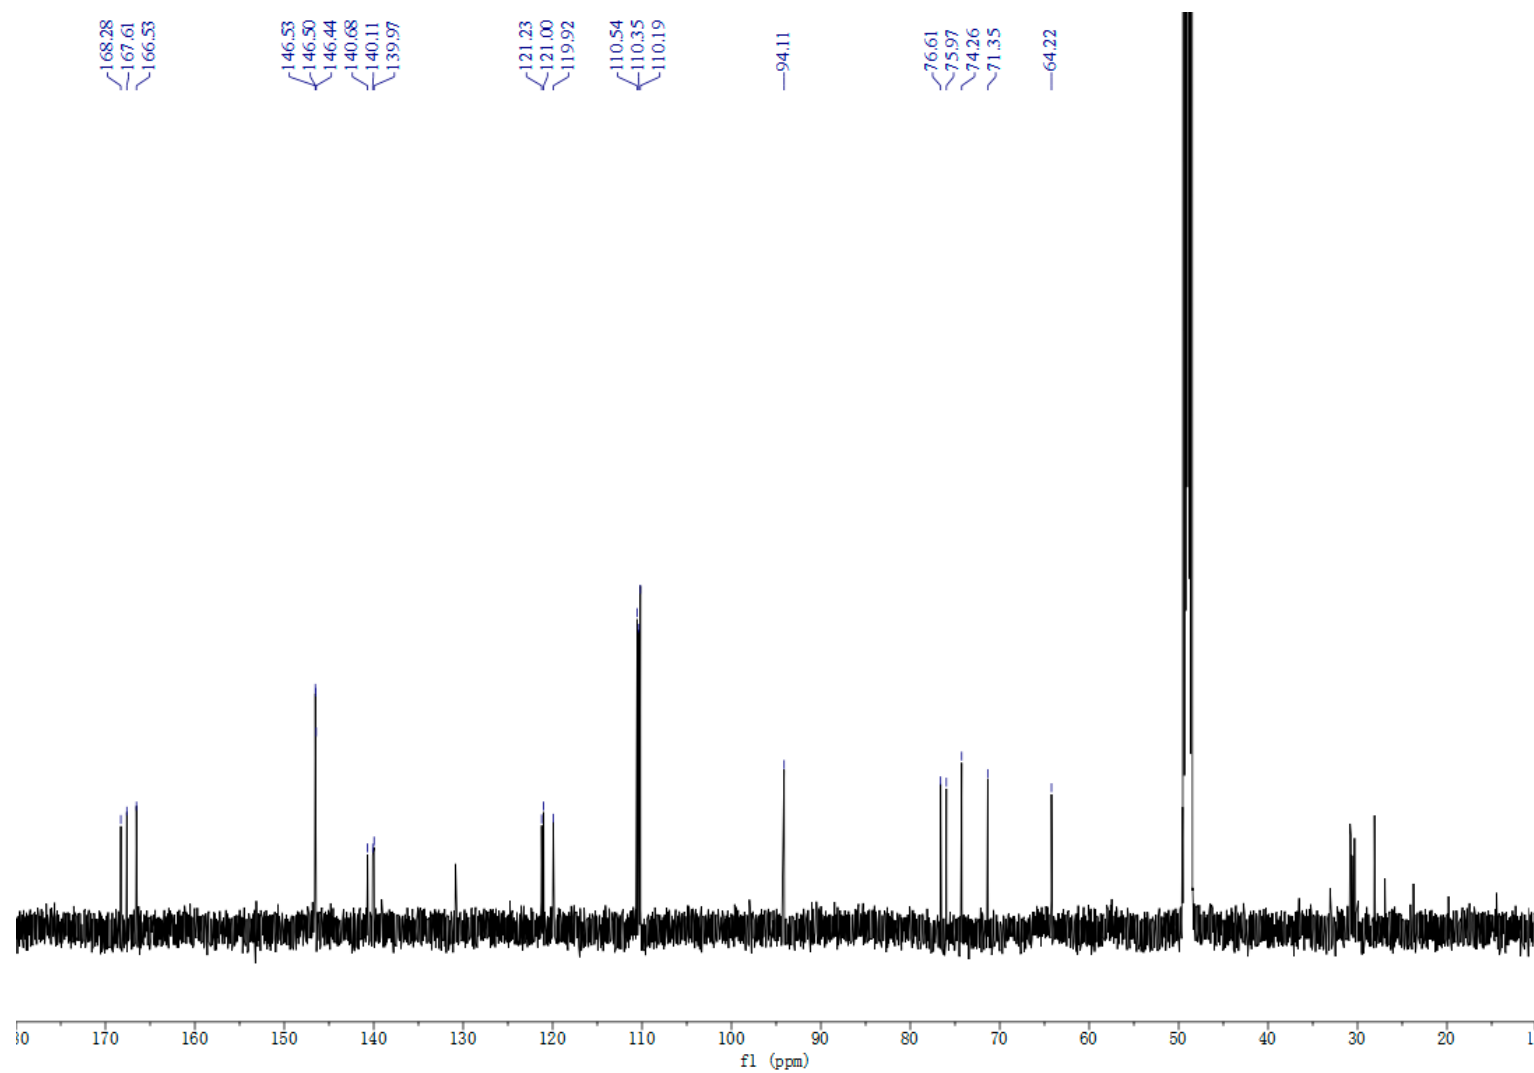

Figure S23.  $^1\text{H}$  NMR spectrum of compound **8** in  $\text{CD}_3\text{OD}$

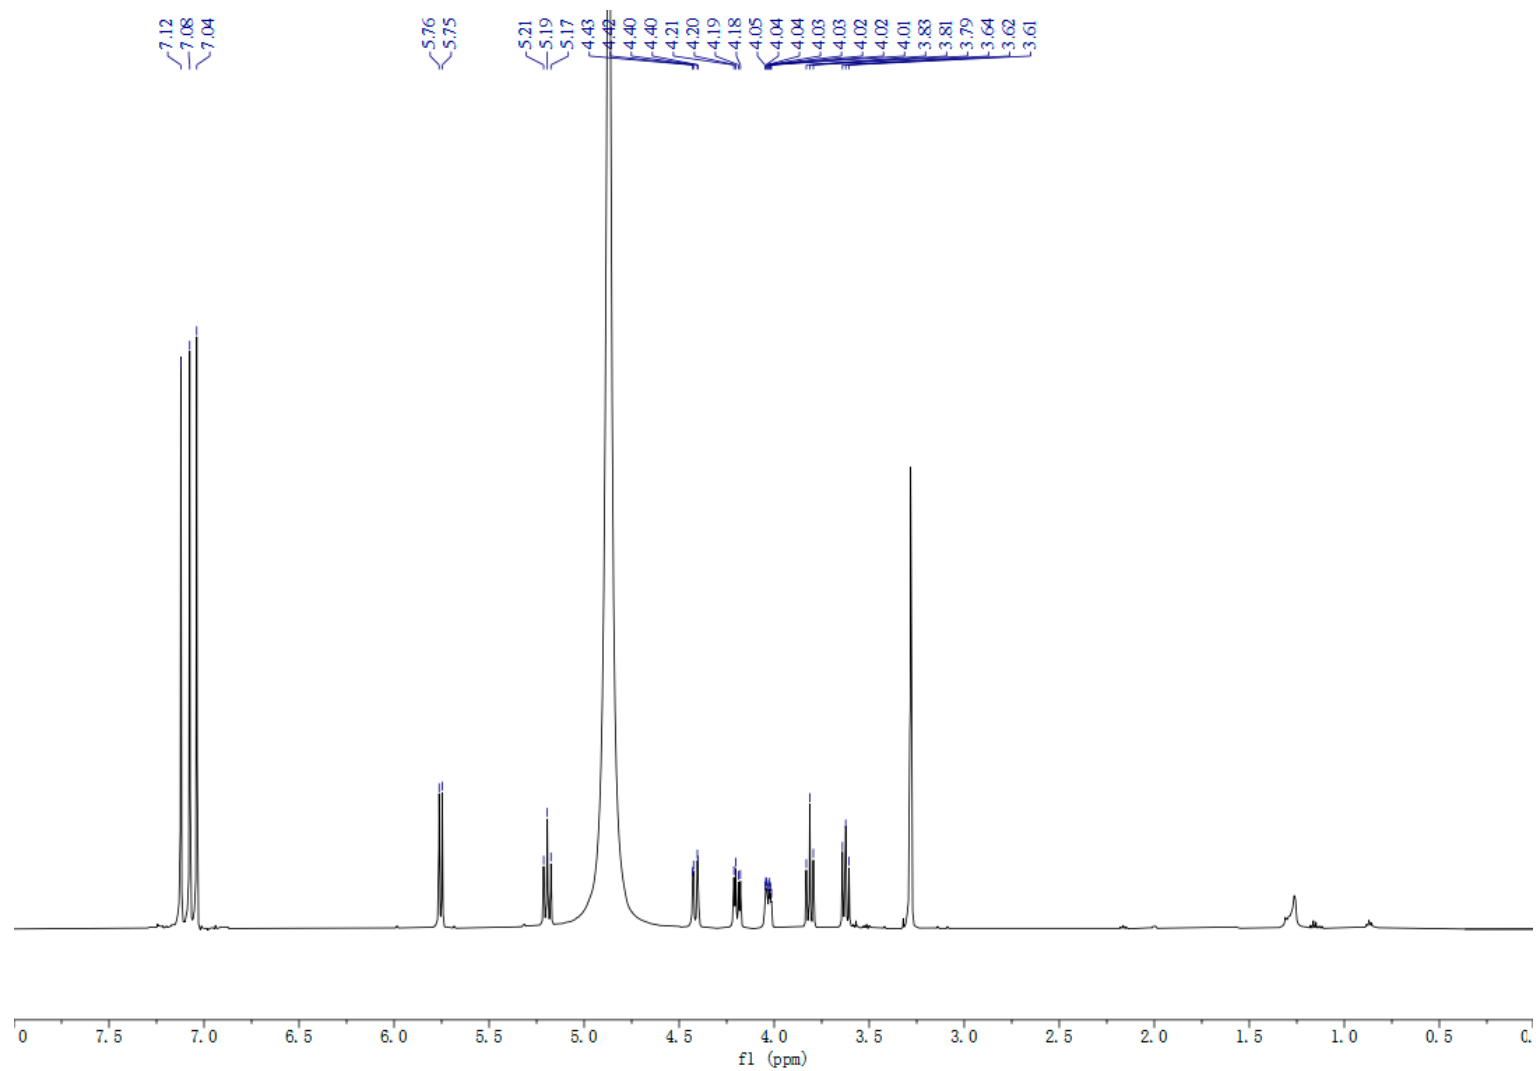

Figure S24.  $^{13}\text{C}$  NMR spectrum of compound **8** in  $\text{CD}_3\text{OD}$

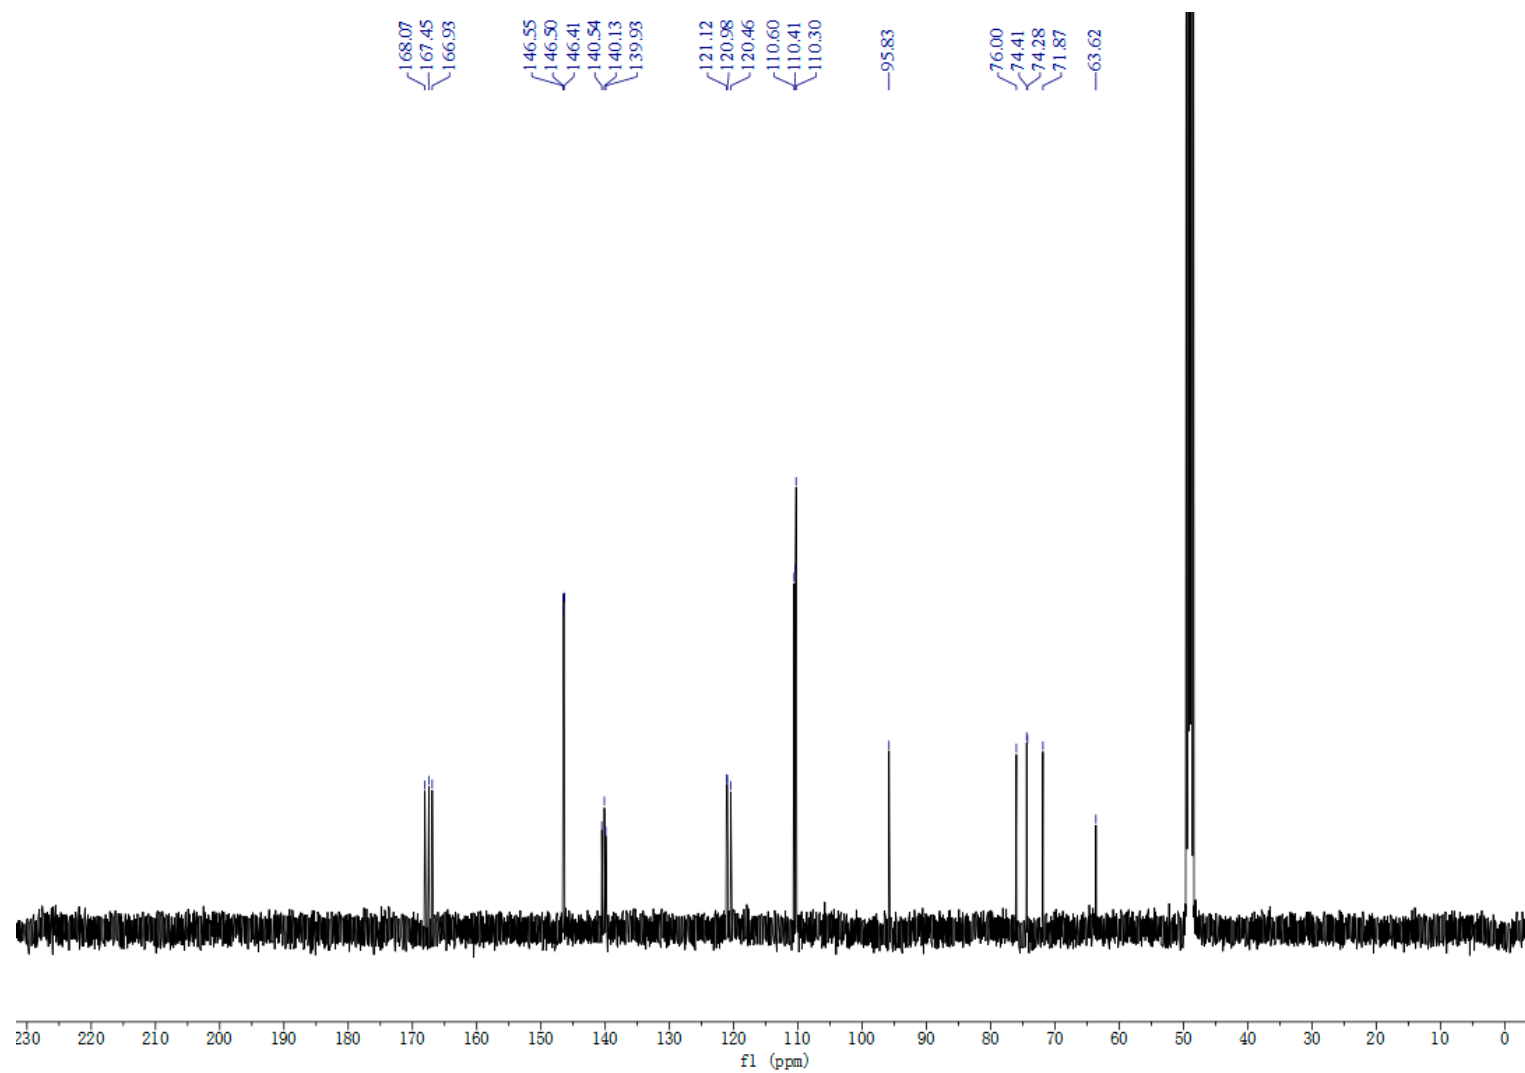

Supplement: Supplementary file 1 [file foods-12-02512-s001.zip › foods-2450752-supplementary.pdf]
